# Supplementary material
Source: ML conference proceedings conference paper supplement (https://openreview.net/forum?id=pwcV9JCrAB)
Supplement: supplementary_material [file full_paper.pdf › anonymous/full_paper.pdf]

# GSM-AGENT: UNDERSTANDING AGENTIC REASONING USING CONTROLLABLE ENVIRONMENTS

**Anonymous authors**

Paper under double-blind review

## ABSTRACT

As LLMs are increasingly deployed as agents, agentic reasoning—the ability to combine tool use, especially search, and reasoning—becomes a critical skill. However, it is hard to disentangle agentic reasoning when evaluated in complex environments and tasks. Current agent benchmarks often mix agentic reasoning with challenging math reasoning, expert-level knowledge, and other advanced capabilities. To fill this gap, we build a novel benchmark, GSM-AGENT, where an LLM agent is required to solve grade-school-level reasoning problems, but is only presented with the question in the prompt without the premises that contain the necessary information to solve the task, and needs to proactively collect that information using tools. Although the original tasks are grade-school math problems, we observe that even frontier models like GPT-5 only achieve 67% accuracy. To understand and analyze the agentic reasoning patterns, we propose the concept of *agentic reasoning graph*: cluster the environment’s document embeddings into nodes, and map each tool call to its nearest node to build a reasoning path. Surprisingly, we identify that revisit, returning to a previously visited node after leaving—widely taken as a crucial pattern in static reasoning, is a missing ability for agentic reasoning among many models. Based on the insight, we propose a tool-augmented test-time scaling method to improve LLM’s agentic reasoning performance by adding tools to encourage models to revisit. We expect our benchmark and the agentic reasoning framework to aid future studies of understanding and pushing the boundaries of agentic reasoning.

## 1 INTRODUCTIONS

Large language models (LLMs) have demonstrated remarkable performance on challenging reasoning tasks (Wei et al., 2022; Srivastava et al., 2023), from arithmetic word problems (Cobbe et al., 2021) to multi-hop question answering (Yang et al., 2018) and program synthesis (Chen et al., 2021). Most previous work focuses on reasoning tasks (Cobbe et al., 2021; Hendrycks et al., 2021; Saxton et al., 2019) that evaluate LLMs’ *static reasoning* capability, where the model receives all necessary information from the prompt and conducts reasoning without external help. Yet, as LLMs are increasingly deployed as *agents* – systems that plan, use external tools, and iteratively refine their hypotheses – the form of reasoning that matters in practice gradually shifts from *static reasoning* to *agentic reasoning* that couples logical inference with decisions about what to read, what to ask next, when to verify, and how to recover from unproductive directions.

In this paper, we aim to understand to what extent strong static reasoning abilities of an LLM can be adapted to the agentic setting, and identify the key skills that may enable this. To achieve this, we aim to (1) compare a model’s reasoning ability on the same or similar tasks under static and agentic settings; (2) identify the important skills that contribute to the performance gap between the two settings; (3) improve the model’s skill in the agentic setting to enhance its agentic reasoning ability. The above steps bring two major challenges, and in this paper, we propose solutions to each of them.

**Challenge 1: Existing benchmarks fail to provide an apples-to-apples comparison of reasoning abilities under the two settings.**

*Solution:* To this end, we introduce GSM-AGENT, a novel benchmark that transforms GSM8K problems into agentic tasks. Specifically, during dataset construction, each original problem is decomposed into a question and several premises; each premise is then converted into a context-rich

document and inserted into a database (the environment). During evaluation, the agent sees only the question and needs to use the provided tools (a `Search` tool and a `NextPage` tool) to discover the relevant documents before solving the math problem. Importantly, we can control the difficulty of the agentic task through careful construction of the database, e.g., by adding distracting documents. Across a broad suite of models, we observe substantial performance drops compared to the static setting where the question and all necessary documents are provided in the prompt. For example, a frontier model like GPT-5 loses roughly 33% absolute accuracy, whereas some models (e.g., DeepSeek-V3) lose up to 80%. The results demonstrate a clear and consistent gap between static and agentic reasoning in a clean and controllable setting.

**Challenge 2: We lack a framework to identify and quantify the core skills that contribute to agentic reasoning capability.**

*Solution:* To understand and analyze the core reasons of the performance gap between the two settings and what drives such significant differences in performance across models under agentic settings, inspired by Minegishi et al. (2025), we propose the concept of *agentic reasoning graph*: cluster the environment’s document embeddings into nodes, and map each tool call (`Search` or `NextPage`) to its nearest node, yielding a discrete reasoning path. This framework allows us to label each reasoning step as *exploration* (first visit to a node), *exploitation* (staying within a node), or *revisit* (returning to a previously visited node after leaving). Our analysis reveals that the *revisit ratio* strongly correlates with the accuracy on GSM-AGENT, which indicates that revisit might be a core skill for strong agentic reasoning. Based on the insight, we propose a tool-augmented method, where we add a new tool that encourages the model to revisit, to improve LLMs’ performance. Experimental results demonstrate that our tool-augmented method exhibits better performance than interaction-round scaling, which enforces agents to interact with the environment for more rounds without considering the quality of each interaction step.

We summarize our contributions as follows:

- We propose GSM-AGENT, a novel benchmark with a controllable environment for evaluating and analyzing the agentic reasoning capability of LLMs and providing a clear comparison between static and agentic reasoning.
- We introduce the concept of *agentic reasoning graph*, which induces a topology over the environment via clustering of document embeddings and maps tool-use traces to discrete paths. This yields interpretable, quantitative measures of *exploration*, *exploitation*, and *revisit* during the reasoning procedure at step resolution to facilitate analysis of agentic reasoning.
- Our analysis of reasoning patterns on agentic reasoning graphs reveals that revisit is an important reasoning skill that strongly correlates with agentic reasoning capability. Based on the insight, we propose a tool-augmented method to improve LLMs’ agentic reasoning capability by encouraging revisit.

## 2 RELATED WORK

**Reasoning with incomplete information.** Multiple works have studied the ability of LLMs to look for missing information. Most relevant to our work, Li et al. (2025) evaluate the ability to ask the right question, including on a variant of GSM8K with missing information. However, their focus is on evaluating whether the model asks specific questions, rather than overall reasoning abilities. Zhou et al. (2025b) compare “passive” and “active” reasoning, similar to our “static” vs “agentic” reasoning, although they use different tasks for the two setups, while our dataset can be used in both scenarios, leading to a better apples-to-apples comparison.

**Agentic reasoning benchmarks.** Several benchmarks have recently been established for evaluating agentic reasoning capabilities of LLMs (Jimenez et al., 2023; Yao et al., 2024; Lu et al., 2024; Trivedi et al., 2024; Patil et al., 2025). In contrast to these works, our benchmark aims to provide a controllable environment that enables direct comparison of agentic reasoning with static reasoning.

**Understanding of reasoning.** Many recent works have focused on understanding the reasoning abilities of LLMs, including the ability to self-correct (Huang et al., 2024), the reliability of reasoning on GSM8K beyond the original benchmark via synthetic extensions (Zhou et al., 2025a;

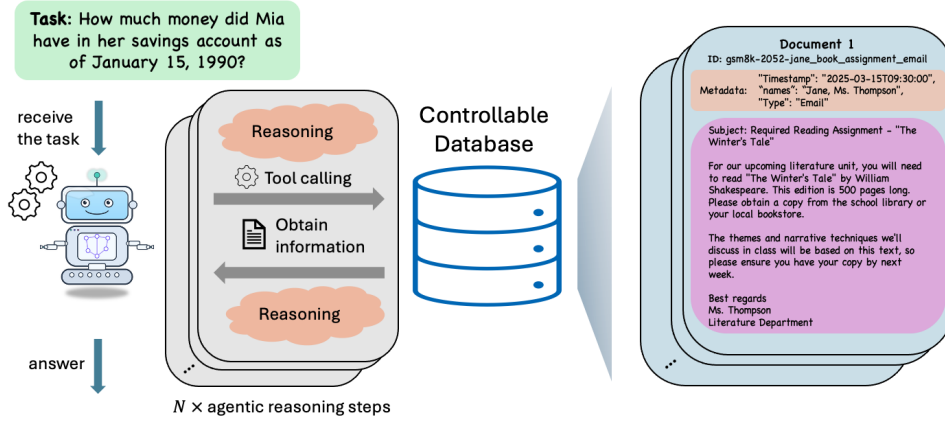

Figure 1: An overview of evaluation tasks in our GSM-AGENT benchmark. The LLM agent receives a task that only contains a question. At each *agentic reasoning* step, the agent needs to decide what information is needed, call the tool to search for information in the database, and reason about the retrieved documents. The agent also needs to decide whether all the necessary information has been collected and when to give the final answer to the task.

Mirzadeh et al., 2025), or the reasoning behaviors or long chain-of-thought models (Yeo et al., 2025; Sun et al., 2025; Minegishi et al., 2025). Our graph-based analysis of explore, exploit, and revisit patterns was partly inspired by these works, though we extend this to the agentic setting with search tools by defining the graph through document embeddings.

### 3 GSM-AGENT BENCHMARK

In this section, we introduce GSM-AGENT, a novel benchmark with controllable environments for comprehensively evaluating the agentic reasoning capabilities of LLMs. In particular, our dataset aims to test LLM agents’ abilities to combine reasoning and tool-use (mainly search) ability to solve mathematical reasoning problems by proactively interacting with the environment using tools. Below, we provide an overview of our benchmark tasks in Section 3.1, and introduce our dataset construction process in Section 3.2.

#### 3.1 OVERVIEW

Our dataset  $\mathcal{D} = (\mathcal{T}, \mathcal{E}, \mathcal{F})$  consists of a set of tasks  $\mathcal{T}$ , an environment  $\mathcal{E}$ , and a set of tools  $\mathcal{F}$  that LLM agents can use to interact with the environment.

**Tasks.** Each task  $T = (q, (p_1, \dots, p_k), a) \in \mathcal{T}$  consists of a question  $q$ ,  $k$  premises  $p_1, \dots, p_k$  ( $k$  can vary for different task instances) and the ground-truth answer  $a$ . Figure 2 provides an example of a task instance that consists of a question and three premises. For a grade-school-level math problem, it is easy for an advanced LLM to solve the task if all premises  $p_1, \dots, p_k$  are provided in the prompt along with the question  $q$ . In our benchmark, the LLM agent will only see the question  $q$  without premises  $p_1, p_2, \dots, p_k$  in the prompt, and it needs to use tools in  $\mathcal{F}$  to find all necessary information in the environment  $\mathcal{E}$  to solve the task (see Figure 1 for a pictorial illustration).

**Environments.** The environment  $\mathcal{E} = \{D_1, D_2, \dots, D_m\}$  consists of a set of documents, where each document corresponds to a premise of a task in  $\mathcal{T}$ . Let  $g_D(\cdot)$  be a document generator, where  $g_D(T) = g_D(q, (p_1, \dots, p_k)) = (D_1, D_2, \dots, D_k)$  and the generated document  $D_i$  contains all necessary information of the premise  $p_i$  for all  $1 \leq i \leq k$ . See the document generation part of Figure 2 for a pictorial illustration. We will introduce the details of our implementation of the document generator  $g_D(\cdot)$  in Section 3.2. Since our environment  $\mathcal{E}$  is a set of documents, we also call  $\mathcal{E}$  a database in the rest of the paper.

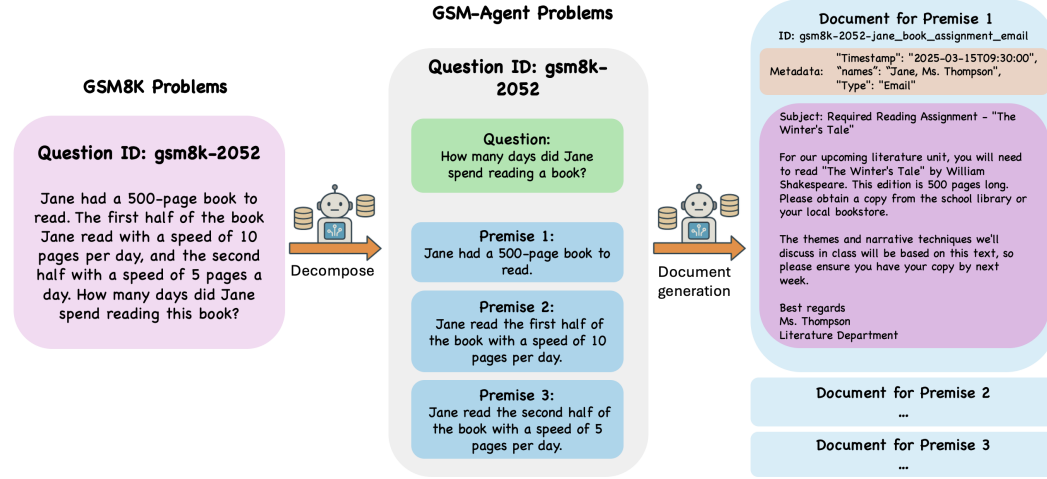

Figure 2: Data processing overview. We first decompose a GSM8k problem into a question and several premises, and then generate a document for each premise to cover its essential information.

**Tools.** In our benchmark, we provide two tools  $\mathcal{F} = \{\text{Search}(\cdot), \text{NextPage}(\cdot)\}$ . For the search tool, an LLM agent can specify a query prompt  $x$  (which can be of any format, such as a sentence or only several keywords) and call  $\text{Search}(x)$ . The search engine will return the top 5 most relevant documents in  $\mathcal{E}$  to the query  $x$ . The agent can also use the  $\text{NextPage}(\cdot)$  tool, which will return the next five most relevant documents. The LLM agent is allowed to call  $\text{Search}(x)$  for multiple different query prompts  $x$  that are decided by the agent itself. For each call of  $\text{Search}(x)$ , the agent is also allowed to call  $\text{NextPage}(\cdot)$  at most 19 times for that search, resulting in retrieving up to the top 100 most relevant documents in the database. See Figure 1 for a pictorial illustration and Section 3.2 for more details about the search engine.

During evaluation, for each task  $T$ , an LLM agent will receive the corresponding question  $q$  (without premises) in the prompt, then reason about what information is missing, call tools  $\text{Search}(x)$  with appropriate search query  $x$  and  $\text{NextPage}(\cdot)$  to collect information from the environment  $\mathcal{E}$ , and solve the problem with information extracted from the retrieved document. In our dataset, the ground-truth answer  $a$  is a numerical value for each task, so we directly compare the final answer given by an LLM agent  $\hat{a}$  to  $a$ , where the task is solved iff  $\hat{a} = a$ .

### 3.2 DATASET CONSTRUCTION

In this section, we introduce our dataset construction procedure in detail. Our GSM-AGENT dataset is built upon the well-known GSM8k problem set, where each task  $T$  in our dataset is constructed based on a problem instance in GSM8k. A simplified dataset construction pipeline is illustrated in Figure 2, while the whole pipeline consists of five stages: (1) data preprocessing; (2) problem decomposition and sharding; (3) document generation; (4) data filtering; (5) database construction. Note that some steps in our pipeline involve using LLMs to process data. Unless otherwise specified, we use Claude-3.5-Sonnet as our default LLM to facilitate data processing.

#### 3.2.1 DATA PREPROCESSING

As shown in Figure 2, for each GSM8k problem, we decompose it into a question and several premises, and convert each premise into a document which will be added to our database. However, naively processing each problem will cause issues.

First, different problems might share the same name of the protagonist(s). Although this is not an issue in the original GSM8k problem since each problem is independent, it could cause conflict or ambiguity in our database, as documents for different tasks will be added to the same database. For example, Alice might spend 5 dollars on ice cream in document  $D_1$  for one task  $T_1$ , and also pay 20



dollars for a book in document  $D_2$  for another task  $T_2$ , which renders the question “How much did Alice spend in total?” ambiguous.

Second, some problems only contain a generic entity without a specific name. For example, consider a task such as “a bookshelf has 20 books at the top and 40 books at the bottom, and how many books are there in the shelf in total”. While the original problem is self-contained, separating the question from premises renders the question “how many books are there in the shelf in total” again confusing and ambiguous since it is unclear which specific bookshelf the question refers to.

To address the above two issues, we carefully design the following three data preprocessing steps to disambiguate the tasks. **Step 1: Entity detection.** In this step, we use LLM to detect the main character of each problem. For problems with a generic main character without a specific name, we flag it as generic. **Step 2: Name assignment for generic entities.** In this step, we assign different names to generic entities. **Step 3: Timestamps assignment to differentiate problems sharing the same entity.** At this step, we assign different timestamps to problems sharing the same entity to ensure no conflict between documents from different problems. The details can be found in Appendix B.

### 3.2.2 PROBLEM DECOMPOSITION AND SHARDING

After systematic data preprocessing to ensure no ambiguity in our tasks and no conflicting documents in our environment, our next step is to decompose each preprocessed problem into a question  $q$  and several self-contained premises  $p_1, p_2, \dots, p_k$ . See the “decompose” part of Figure 2 for an example. The decomposition is executed by an LLM agent, where the agent receives a preprocessed problem along with its timestamp as the input, then breaks down the problem narrative into a list of individual self-contained and consistent premises, rephrases the core question, and carries over the timestamp. In particular, if the problem shares an entity name with another problem, its timestamp will be explicitly stated in the question  $q$  outputted by the agent to make sure the question itself is unambiguous.

### 3.2.3 DOCUMENT GENERATION

The next stage is document generation. The main purpose of this stage is to convert each premise of each problem into a context-rich document, which will be added to our database (i.e., the environment  $\mathcal{E}$ ) in the final stage. We conduct the following three steps to ensure a high-quality database and a reasonable level of difficulty for our tasks. **Step 1: Hierarchical document generation.** At this step, we generate a high-level coherent story for a problem. **Step 2: Independence verification.** We prompt Claude-3.5-Sonnet, giving it each document-premise pair and the original question, and asks it to judge whether the document contains extra information that is not covered by the premise. By doing so, we make sure that documents are independent, with no overlapping information. **Step 3: Document anonymization.** To ensure the difficulty of our benchmark, we randomly anonymize a subset of the document to avoid LLM agents from “cheating” by blindly querying the name of the main character. The details of each step can be found in Appendix B.

### 3.2.4 DATA FILTERING

Since the previous stages involve using LLM agents to process data, and original premises are converted into much longer documents, some of the generated tasks may turn out to be problematic or unsolvable. To ensure the quality of our dataset after the above data processing stages, a rule of thumb is to ensure that all generated tasks are solvable when provided with complete information (i.e., all documents corresponding to their premises). Therefore, for each problem, we test whether `claude-3.5-sonnet` can solve it given the question and its corresponding documents. We only keep the problems that `claude-3.5-sonnet` can correctly solve to ensure a high-quality dataset. After our data filtering stage, there are 7323 problems left in our dataset, with 32315 unique problems stored in the chroma database.

### 3.2.5 DATABASE CONSTRUCTION

The final stage is to build the environment  $\mathcal{E}$  (i.e., the database) using generated documents. We use Chroma to build our database, where the content (excluding document ID and metadata)

of each document is embedded into a vector that will be used for document retrieval. We use `text-embedding-3-large` as our default embedding model.

Moreover, we built three datasets that reflect different levels of difficulty of our benchmark: **GSM-AGENT-Full**: contains all problems after data filtering; **GSM-AGENT-Medium**: contains 25% of problems after data filtering; **GSM-AGENT-Small**: contains 6.25% of problems after data filtering.

For each dataset, its environment is a database that contains all the documents of problems in the dataset. For the results reported in Section 4, we evaluate models on GSM-AGENT-Full unless otherwise specified.

## 4 RESULTS & ANALYSIS

In this section, we first present the main evaluation results on a variety of mainstream LLMs on our GSM-AGENT dataset (Section 4.1), then analyze the agentic reasoning pattern and identify the core skill, which is *revisit*, that correlates to strong agentic reasoning capabilities (Section 4.2), and finally propose a tool-augmented method to improve models’ agentic reasoning capability by encouraging models to revisit (Section 4.3). We use LangChain ReAct agent for all evaluation settings, with temperature set to 0.4 and max tokens 4096.

### 4.1 OVERALL PERFORMANCE

Table 1: Evaluation results under zero-shot prompting with ReAct agent across models.<sup>1</sup> Acc and FF are shown as percentages; other metrics use the units indicated. Acronyms: Acc=Accuracy; SR=Search Rounds, which is the number of tool calls to solve a task; Dur(s)=Duration (seconds), which is the time the agent spent to solve the task; SC=Search-Complete rate, which is the proportion of tasks that an agent find all relevant documents; ER=Extra Rounds, which is the number of tool calls after all relevant documents are found; FF=Follow-Format rate, which is the proportion of tasks that an agent follows the required format to solve; PremT=Premature-Total rate, which is the proportion of tasks that an agent attempted to provide a premature answer before making the final decision; TotTok=Total Generated Tokens; Tok/R=Mean Tokens per Round. All results are averaged over three random seeds. For each metric,  $\uparrow$  indicates higher is better and  $\downarrow$  means lower is better.

| Setting                                | Acc $\uparrow$ | SR    | Dur(s) | SC $\uparrow$ | ER $\downarrow$ | FF $\uparrow$ | PremT $\downarrow$ | TotTok $\downarrow$ | Tok/R $\downarrow$ |
|----------------------------------------|----------------|-------|--------|---------------|-----------------|---------------|--------------------|---------------------|--------------------|
| Solvable by any model                  | 88.00%         | Nan   | Nan    | Nan           | Nan             | Nan           | Nan                | Nan                 | Nan                |
| o3                                     | 68.46%         | 13.33 | 117.85 | 53%           | 4.89            | 95%           | 0%                 | 5775.75             | 386.03             |
| GPT-5                                  | 66.78%         | 9.98  | 116.00 | 52%           | 2.18            | 100%          | 1%                 | 7184.10             | 615.99             |
| Grok-4                                 | 53.00%         | 7.19  | 126.01 | 42%           | 2.86            | 100%          | 0%                 | 3817.42             | 599.72             |
| Claude-4-sonnet (fewshot) <sup>2</sup> | 51.50%         | 9.27  | 47.90  | 40%           | 4.41            | 100%          | 10%                | 1028.52             | 118.65             |
| Gemini-2.5-Pro                         | 38.33%         | 2.93  | 51.59  | 25%           | 0.20            | 82%           | 3%                 | Nan                 | Nan <sup>3</sup>   |
| Kimi-K2-Instruct                       | 37.42%         | 5.41  | 31.00  | 24%           | 0.53            | 92%           | 0%                 | 245.34              | 56.18              |
| Gemini-2.5-Flash                       | 25.33%         | 1.88  | 17.13  | 14%           | 0.12            | 99%           | 4%                 | Nan                 | Nan                |
| GPT-4o                                 | 22.67%         | 1.92  | 21.27  | 22%           | 2.72            | 94%           | 1%                 | 135.20              | 92.22              |
| Llama-4-Maverick                       | 20.00%         | 2.10  | 21.94  | 17%           | 0.26            | 97%           | 3%                 | 504.93              | 211.30             |
| DeepSeek-V3                            | 19.42%         | 0.94  | 14.30  | 8%            | 0.00            | 82%           | 0%                 | 38.95               | 41.33              |
| Qwen3-235B                             | 19.30%         | 1.13  | 25.76  | 19%           | 4.40            | 96%           | 0%                 | 184.82              | 173.19             |
| Claude-4-Sonnet                        | 18.67%         | 2.46  | 21.27  | 14%           | 3.14            | 33%           | 1%                 | 243.93              | 98.23              |
| Llama-4-Scout                          | 12.54%         | 2.07  | 14.93  | 9%            | 1.76            | 86%           | 4%                 | 215.48              | 118.96             |

Table 1 highlights the large performance gaps between different models. While some strong agents achieve relatively high accuracy, many open models remain surprisingly weak. This result is puzzling.

<sup>1</sup>We observe that zero-shot prompting renders the most stable result across most models, better than fewshot prompt or multi-agent system. However, it cannot render meaningful results for DeepSeek-R1 and Claude-Opus. DeepSeek expects a different tool-use format than other models. Claude frequently asks the user for additional information and thus requires careful prompting to fix. To ensure a fair comparison across models, we excluded the two models in the evaluation.

<sup>2</sup>We observed that Claude-4-sonnet requires special few-shot prompt strategies to achieve decent performance. However, such a prompt can hurt the performance of many other models compared to the default zero-shot prompting. To ensure fair comparison, we report both zero-shot and few-shot prompting results for Claude-4-sonnet.

<sup>3</sup>Number missing due to LangChain output format mismatch for Gemini model series.

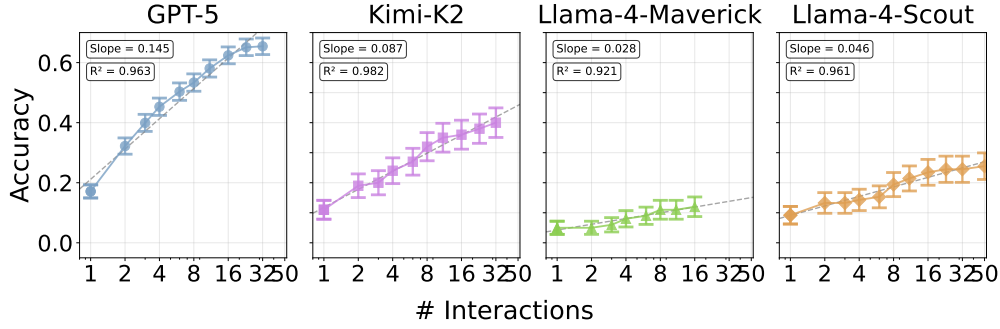

Figure 3: Interaction round scaling. The number of iteration rounds is defined as the number of tool calls. For each model, we first collect the reasoning trajectory on each task under zero-shot prompting. For a specified number of interaction rounds  $n$ , a trajectory is considered correct either if it answers the task correctly within  $n$  rounds, or it successfully collects all necessary documents within  $n$  rounds and gives a correct answer eventually. GPT-5 exhibits a much stronger interaction-round scaling than the other three models. Note that  $x$ -axis is in logarithmic scale.

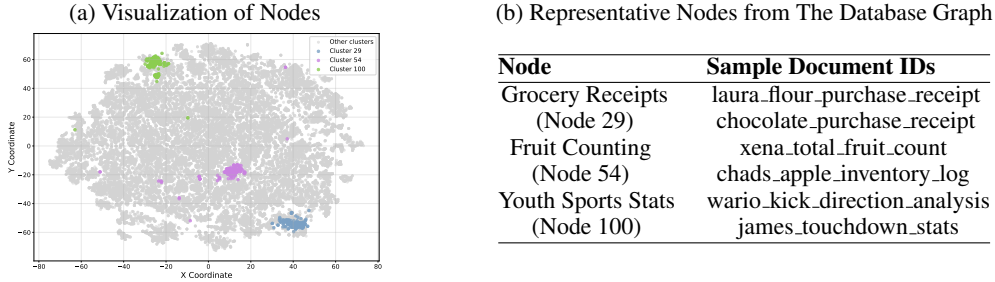

Table 2: *Left (a):* A t-SNE visualization of the search database embeddings. It highlights three clusters whose centroids define the embeddings for nodes 29, 54, and 100. *Right (b):* A summary of documents for these nodes. The documents have semantic coherence within each cluster.

zling, since our GSM-AGENT environment—adapted from GSM8K—requires only grade-school math and basic common sense reasoning. Nevertheless, even frontier models fall short of perfect performance, with the best accuracy reaching just 68.46% (o3), while Llama-4-Scout only achieves 12.54%. These discrepancies raise an important question:

*What drives such big differences in performance across models, given such a simple environment?*

**Simple interaction-time scaling does not improve agentic reasoning.** Table 1 shows that models tend to achieve higher accuracy when they perform more search rounds. A natural hypothesis for the observed performance gap is therefore differences in interaction-time scaling. To test this, we selected three open models (Kimi-K2-Instuct, Llama-4-Maverick, and Llama-4-Scout) and prompted them to continue searching whenever they attempted to stop. For comparison, we also measured the test-time scaling behavior of GPT-5, a representative strong proprietary model. As shown in Figure 3, the accuracy of the open models improves only marginally with additional search rounds, exhibiting far weaker interaction-time scaling than the proprietary models (GPT-5). This finding suggests that we must look beyond just interaction time and instead examine the quality of interaction choices—this motivates the design of our *agentic reasoning graph*.

#### 4.2 IDENTIFYING AND MEASURING CORE SKILLS CONTRIBUTING TO AGENTIC REASONING

In this section, we propose a new framework to understand and analyze models’ agentic reasoning patterns and, thus, identify the core skills that contribute to a model’s reasoning ability in agentic settings. Inspired by Minegishi et al. (2025), we define the *agentic reasoning graph* below.

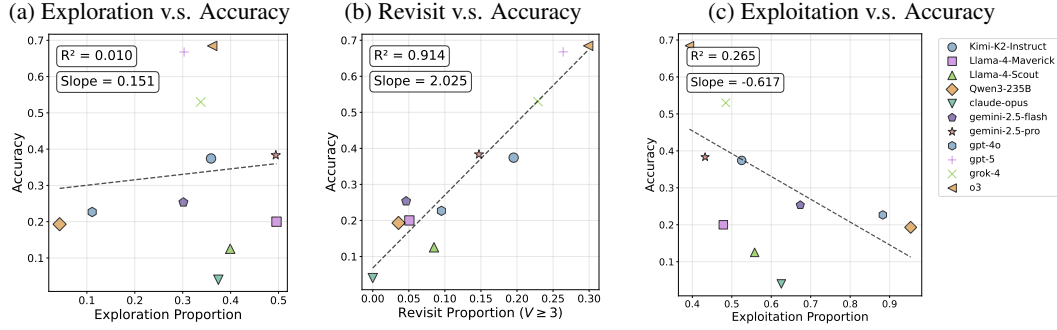

Figure 4: Correlation between accuracy and exploration, exploitation, and revisit ratio. The three ratios are defined as the proportion of exploration steps (visit a node that has never been reached), exploitation steps (visit the same node as the last step), and revisit steps (revisit a previously reached node after leaving) to the total reasoning steps. We plot their correlation to the models’ accuracy on our GSM-AGENT benchmark. The plots show that the model accuracy has a weak correlation to the exploration ratio, a strong correlation to the revisit ratio and a negative correlation to the exploitation ratio.

**Nodes of the agentic reasoning graph.** Assume the environment  $\mathcal{E} = \{D_i\}_{i=1}^N$  contains  $N$  documents. Denote the embedding model to be  $e_\theta(\cdot)$  and thus  $e_i = e_\theta(D_i) \in \mathbb{R}^d$  is the embedding vector of document  $D_i$ . We run  $K$ -means ( $K = 250$ ) on  $\{e_i\}_{i=1}^N$  to get clusters  $\{C_k\}_{k=1}^K$  with centroid  $\{c_k\}_{k=1}^K$ , and each centroids  $c_k \in \mathbb{R}^d$  correspond to a node  $v_k$  in the graph. Therefore, the vertex set of the agentic reasoning graph is  $V = \{v_1, \dots, v_K\}$ . See Table 2 for a visualization of the vertex set of our database and examples for the semantic meaning of representative nodes.

**Agentic reasoning path.** Assume the agent makes  $T$  tool calls in total in the whole reasoning trace. For the  $t$ -th tool call, if it calls  $\text{Search}(x)$ , then the agentic reasoning node  $p_t$  for the  $t$ -th tool call is defined as  $p_t = \arg \min_{v_k \in V} \|q(x) - c_k\|_2$ , where  $q(x) \in \mathbb{R}^d$  is the embedding of the query prompt  $x$ . If the agent calls  $\text{NextPage}(\cdot)$  for the  $t$ -th tool call, then the agentic reasoning node is defined as  $p_t = p_{t-1}$ . The agentic reasoning path is then defined as  $\pi = (p_1, \dots, p_T)$ .

**Exploration, exploitation and revisit.** For each step  $p_t$  in the reasoning path, we classify it into one of the three categories. For the first step  $p_1$ , it is always classified as an *exploration step*. For  $t > 1$ , if  $p_t \notin \{p_1, \dots, p_{t-1}\}$ , i.e.,  $p_t$  has never been visited in previous steps, then  $p_t$  is also an exploration step. If  $p_t \in \{p_1, \dots, p_{t-1}\}$ , it is considered as an *exploitation step* if  $p_t = p_{t-1}$ , and otherwise a *revisit step*. The exploration ratio is defined as the proportion of exploration steps among the total number of steps  $T$ . Similarly, we can define the exploitation and revisit ratio. These three ratios can thus be used to quantify the reasoning pattern and facilitate deeper analysis.

Figure 4 shows that models’ accuracy has a strong correlation to the revisit ratio during the reasoning trace, which implies that revisit is an important skill in agentic reasoning.

#### 4.3 IMPROVING AGENTIC REASONING CAPABILITY VIA TOOL-AUGMENTED SCALING

Given the insight from the analysis in Section 4.2, instead of naively scaling up the interaction rounds that is widely adopted for static reasoning, we propose to use tool-augmented scaling, which might be a more efficient scaling paradigm for agentic reasoning.

**Thinking tool, exploration tool, and revisit tool.** We introduce three new tools for our experiments. (1)  $\text{Thinking}(\cdot)$  is a thinking tool, which will copy a model’s preceding tokens to enforce thinking whenever called. (2)  $\text{Explore}(x)$  is an exploration tool which has the same effect as  $\text{Search}(x)$  while the system prompt will instruct the model to use  $\text{Explore}(x)$  to explore different search queries. (3)  $\text{Revisit}(x)$  is a revisit tool which has the same effect as  $\text{Search}(x)$  while the system prompt will instruct the model to use  $\text{Revisit}(x)$  to revisit previously called queries.

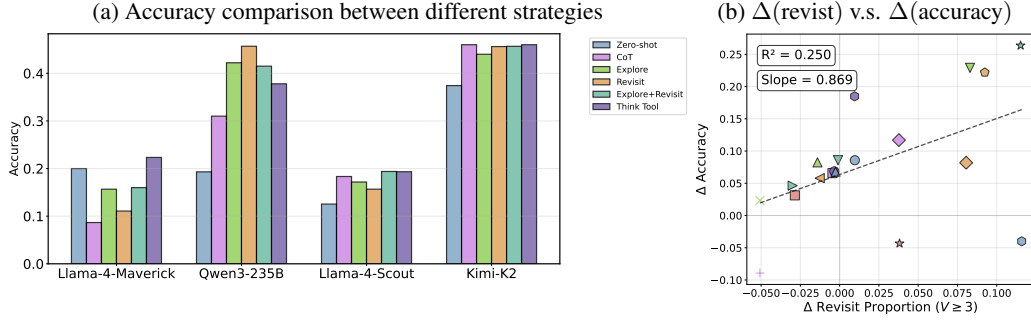

Figure 5: Visualization of performance gain via encouraging the revisit reasoning pattern. In Figure 5a, we compare five different strategies to zero-shot prompting on four different models. CoT is a prompt-only strategy where the prompt will instruct the model to think more. The remaining four strategies are all tool-augmented methods by adding different combinations of the three tools, Thinking( $\cdot$ ), Explore( $\cdot$ ), Revisit( $\cdot$ ), to the tool set. For Llama-4-Maverick and Qwen3-235B, tool-augmented methods consistently outperform the prompt-based CoT strategy. For Llama-4-Scout and Kimi-K2, tool-augmented methods achieve comparable performance to the CoT method. For most cases, both the tool-augmented method and prompt-based CoT improve over zero-shot prompting. Figure 5b plots the correlation between the increase in revisit ratio and the increase in the accuracy for any of the strategies. It shows a strong correlation between the enhancement of revisit ability and performance improvement.

We tested four combinations of the above three tools: (1) adding Thinking( $\cdot$ ) only to the tool set  $\mathcal{F}$ ; (2) adding Explore( $\cdot$ ) only; (3) Revisit( $\cdot$ ) only; (4) adding both Explore( $\cdot$ ) and Revisit( $\cdot$ ).

Figure 5a shows that adding tools outperforms or achieves similar performance to the CoT prompt strategy in most cases. Moreover, Figure 5b shows a strong correlation between the increase of accuracy and revisit ratio, which further indicates that revisit is an important skill for agentic reasoning. The above results indicate that the tool-augmented method may serve as a more efficient test-time scaling paradigm than interaction-time scaling for agentic reasoning.

## 5 CONCLUSIONS

In this paper, we study LLMs’ agentic reasoning capability, where an LLM agent needs to combine tool-use and reasoning ability to solve tasks. We first propose a novel benchmark, GSM-AGENT, where an LLM agent is required to solve grade-school math reasoning problems but must proactively search for necessary information from the environment. Our comprehensive evaluation of various models shows a significant gap in performance across different models in the seemingly simple environment. We further analyze the reasoning patterns of different models using the agentic reasoning graph and identify revisit as an important skill for agentic reasoning. Finally, we propose a tool-augmented scaling method that adds new tools to encourage the model to revisit, which improves agents’ performance on our benchmark for different models. We hope that our benchmark can serve as a controllable and clean environment for future study of agentic reasoning, and our framework of agentic reasoning graph can bring new insights into better understanding and improvement of reasoning ability for LLM agents.

## REFERENCES

- Mark Chen, Jerry Tworek, Heewoo Jun, Qiming Yuan, Henrique P. de Oliveira Pinto, Jared Kaplan, Harrison Edwards, Yuri Burda, Nicholas Joseph, Greg Brockman, et al. Evaluating large language models trained on code. In *arXiv preprint arXiv:2107.03374*, 2021.
- Karl Cobbe, Vineet Kosaraju, Mohammad Bavarian, Mark Chen, Heewoo Jun, Lukasz Kaiser, Matthias Plappert, Jerry Tworek, Jacob Hilton, Reiichiro Nakano, Christopher Hesse, and John

- Schulman. Training verifiers to solve math word problems. *arXiv preprint arXiv:2110.14168*, 2021.
- Dan Hendrycks, Collin Burns, Saurav Kadavath, Akul Arora, Steven Basart, Eric Tang, Dawn Song, and Jacob Steinhardt. Measuring mathematical problem solving with the math dataset. In *Advances in Neural Information Processing Systems*, 2021.
- Jie Huang, Xinyun Chen, Swaroop Mishra, Huaixiu Steven Zheng, Adams Wei Yu, Xinying Song, and Denny Zhou. Large language models cannot self-correct reasoning yet. In *International Conference on Learning Representations (ICLR)*, 2024.
- Carlos E Jimenez, John Yang, Alexander Wettig, Shunyu Yao, Kexin Pei, Ofir Press, and Karthik Narasimhan. Swe-bench: Can language models resolve real-world github issues? *arXiv preprint arXiv:2310.06770*, 2023.
- Belinda Z Li, Been Kim, and Zi Wang. Questbench: Can llms ask the right question to acquire information in reasoning tasks? *arXiv preprint arXiv:2503.22674*, 2025.
- Jiarui Lu, Thomas Holleis, Yizhe Zhang, Bernhard Aumayer, Feng Nan, Felix Bai, Shuang Ma, Shen Ma, Mengyu Li, Guoli Yin, et al. Toolsandbox: A stateful, conversational, interactive evaluation benchmark for llm tool use capabilities. *arXiv preprint arXiv:2408.04682*, 2024.
- Gouki Minegishi, Hiroki Furuta, Takeshi Kojima, Yusuke Iwasawa, and Yutaka Matsuo. Topology of reasoning: Understanding large reasoning models through reasoning graph properties. *arXiv preprint arXiv:2506.05744*, 2025.
- Seyed Iman Mirzadeh, Keivan Alizadeh, Hooman Shahrokhi, Oncel Tuzel, Samy Bengio, and Mehrdad Farajtabar. Gsm-symbolic: Understanding the limitations of mathematical reasoning in large language models. In *International Conference on Learning Representations (ICLR)*, 2025.
- Shishir G Patil, Huanzhi Mao, Fanjia Yan, Charlie Cheng-Jie Ji, Vishnu Suresh, Ion Stoica, and Joseph E Gonzalez. The berkeley function calling leaderboard (bfcl): From tool use to agentic evaluation of large language models. In *International Conference on Machine Learning (ICML)*, 2025.
- David Saxton, Edward Grefenstette, Felix Hill, and Pushmeet Kohli. Analysing mathematical reasoning abilities of neural models. In *International Conference on Learning Representations (ICLR)*, 2019.
- Aarohi Srivastava, Abhinav Rastogi, Abhishek Rao, Ahmed Shoeb, Abubakar Abid, et al. Beyond the imitation game: Quantifying and extrapolating the capabilities of language models. *Transactions on Machine Learning Research*, 2023.
- Yiyu Sun, Shawn Hu, Georgia Zhou, Ken Zheng, Hannaneh Hajishirzi, Nouha Dziri, and Dawn Song. Omega: Can llms reason outside the box in math? evaluating exploratory, compositional, and transformative generalization. *arXiv preprint arXiv:2506.18880*, 2025.
- Harsh Trivedi, Tushar Khot, Mareike Hartmann, Ruskin Manku, Vinty Dong, Edward Li, Shashank Gupta, Ashish Sabharwal, and Niranjana Balasubramanian. Appworld: A controllable world of apps and people for benchmarking interactive coding agents. *arXiv preprint arXiv:2407.18901*, 2024.
- Jason Wei, Xuezhi Wang, Dale Schuurmans, Maarten Bosma, Brian Ichter, Fei Xia, Ed H. Chi, Quoc V. Le, and Denny Zhou. Chain-of-thought prompting elicits reasoning in large language models. In *Advances in Neural Information Processing Systems*, 2022.
- Zhilin Yang, Peng Qi, Saizheng Zhang, Yoshua Bengio, William Cohen, Ruslan Salakhutdinov, and Christopher D. Manning. Hotpotqa: A dataset for diverse, explainable multi-hop question answering. In *Proceedings of the 2018 Conference on Empirical Methods in Natural Language Processing (EMNLP)*, 2018.
- Shunyu Yao, Noah Shinn, Pedram Razavi, and Karthik Narasimhan.  $\tau$ -bench: A benchmark for tool-agent-user interaction in real-world domains. *arXiv preprint arXiv:2406.12045*, 2024.

Edward Yeo, Yuxuan Tong, Morry Niu, Graham Neubig, and Xiang Yue. Demystifying long chain-of-thought reasoning in llms. *arXiv preprint arXiv:2502.03373*, 2025.

Yang Zhou, Hongyi Liu, Zhuoming Chen, Yuandong Tian, and Beidi Chen. Gsm-infinite: How do your llms behave over infinitely increasing context length and reasoning complexity? In *International Conference on Machine Learning (ICML)*, 2025a.

Zhanke Zhou, Xiao Feng, Zhaocheng Zhu, Jiangchao Yao, Sanmi Koyejo, and Bo Han. From passive to active reasoning: Can large language models ask the right questions under incomplete information? In *International Conference on Machine Learning (ICML)*, 2025b.



## A DATABASE DETAILS

### A.1 STATISTICS

Let  $\{D_i\}_{i=1}^{p_k}$  be the documents associated with problem  $k$ . We use the K-means to decide the classes of the documents  $(c(D_1), \dots, c(D_{p_k}))$ . Define the “span” of problem  $k$  as the number of unique classes among  $(c(D_1), \dots, c(D_{p_k}))$ . We also compute the “Documents-Problem” ratio, which is the average of  $p_k$ . Table 3 displays the summary statistics among three database sizes.

Table 3: Summary statistics of the database.

| Category                                | Mean | Std Dev | Min | Max | Median |
|-----------------------------------------|------|---------|-----|-----|--------|
| <b>Span Statistics</b>                  |      |         |     |     |        |
| Full                                    | 2.89 | 1.28    | 1   | 10  | 3.0    |
| Medium                                  | 2.92 | 1.31    | 1   | 10  | 3.0    |
| Small                                   | 2.84 | 1.29    | 1   | 8   | 3.0    |
| <b>Documents per Problem Statistics</b> |      |         |     |     |        |
| Full                                    | 4.41 | 1.74    | 1   | 14  | 4.0    |
| Medium                                  | 4.41 | 1.77    | 1   | 14  | 4.0    |
| Small                                   | 4.41 | 1.87    | 2   | 13  | 4.0    |

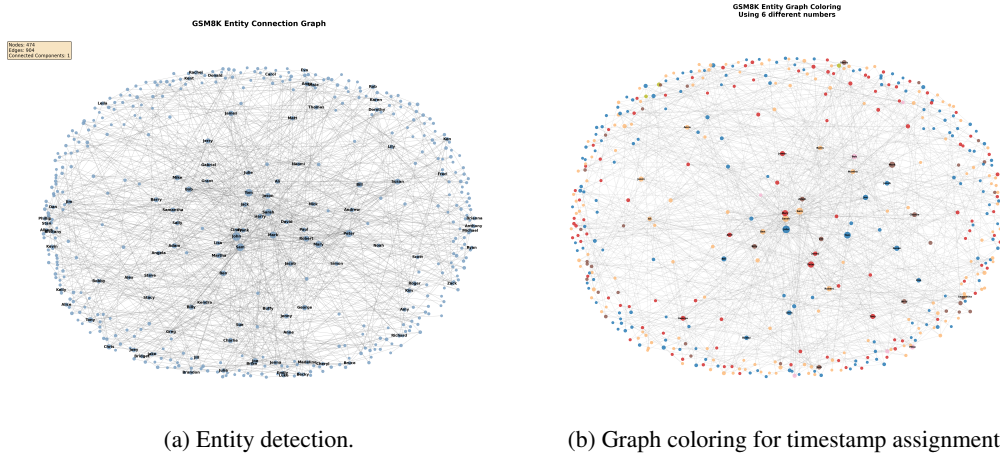

Figure 6: Example of entity detection and timestamp assignment.

## B ADDITIONAL DETAILS FOR DATASET CONSTRUCTION

### B.1 ADDITIONAL DETAILS FOR DATA PREPROCESSING

**Step 1: Entity detection.** First, for each original GSM8k problem, we use LLM agents to detect the name of the core narrative entity (or protagonist). The agent will prioritize identifying a single, core proper noun, such as a person’s name. For example, if a problem involves both “Natalia” and “her friends”, the agent will identify “Natalia” as the core entity. When there are multiple, equally important entities such as “Alice and Bob”, the agent will extract both of them as the core entities. For problems where the core entity is a generic one without a specific name (such as “the girl” or “the zoo”), the agent will also extract the entity and flag it as generic.

**Step 2: Name assignment for generic entities.** For each problem flagged as having a generic core entity, we assign a name to specialize the entity. We pre-define two lists for the first name (such as [“Alice”, “Ben”, ...]) and last name (such as [“Smith”, “Johnson”, ...]), respectively. Then a full name will be systematically selected from all combinations of first and last names for each generic entity, ensuring maximum uniqueness. For entities that are not persons such as “the store”, the assigned name will serve as its owner such as “John Doe’s store”. Finally, an LLM-based rewriting module will be invoked to rewrite the question text to naturally incorporate the assigned full name.

**Step 3: Timestamps assignment to differentiate problems sharing the same entity.** To address the issue that different problems might share the same entity names, which can result in conflict documents, we assign a timestamp to each problem. More specifically, we define an entity graph (see Figure 6a) where each node  $v_i$  represents a problem  $T_i$ . Let  $N_i$  denote the set of names of core entities in problem  $T_i$ . Two nodes  $v_i$  and  $v_j$  are connected by an edge iff they share at least one entity name, i.e.,  $N_i \cap N_j \neq \emptyset$ . Then we assign each node  $v_i$  a color  $c_i$ , such that no two adjacent nodes have the same color (see Figure 6b for an example of coloring the entity graph using six colors). Each color represents a different timestamp, so each problem is assigned a timestamp such that each entity has different timestamps in their occurrence in different problems. The temporal separation allows the LLM agent to treat different problems as distinct events in an entity’s life. To ensure the time span of a problem is reasonable, we design the timestamp to include both the year and month, such as “1990-09”.

### B.2 ADDITIONAL DETAILS FOR DOCUMENT GENERATION

**Step 1: Hierarchical document generation.** To make sure the documents from the same task are consistent, we adopt a hierarchical, multi-round generation using an LLM agent as the document generator. In the first round, the agent sees the whole problem (including the question, all premises, and the timestamp) and generates a high-level, consistent story for the entire problem. In the subsequent rounds, the agent is presented with each premise one by one, and generates a single, contextually rich document that encapsulates the information from the given premise based on the high-level story generated in the first round. Each generated document contains three fields: (1) the content of the document; (2) a unique ID assigned to the document; (3) metadata of the document (timestamp, name, and type).

**Step 2: Independence verification.** To prevent information leakage between premises (i.e., one document reveals important information about another premise, especially involving quantities), which makes the task easier, we perform an independence check using an LLM agent. Specifically, for each document, the agent receives the full original problem text, the target premise that the document should cover, and a list of other premises that the document should not cover, along with the document itself. If the agent identifies information from other premises, it will propose a modification to the current document.

**Step 3: Document anonymization.** To avoid an LLM agent from “cheating” by naively searching documents only by the name of the protagonist of a given task instead of reasoning about what information is needed, we perform document anonymization, where we sample a random subset of all documents (we choose 30%), and ask an LLM agent to rewrite each document such that the name of the entity will not be presented in the content of the document. We move the entity name to the

document’s metadata, and an LLM agent being evaluated can view the metadata after it successfully retrieves the document to validate whether the document is related to the given task.

## C ABLATION EXPERIMENTS FOR EVALUATIONS AND DATA CONSTRUCTION

Table 4: Full results across models (all settings). Acc and FF are percentages; other metrics use indicated units. Acronyms: Acc=Accuracy; SR=Search Rounds; Dur(s)=Duration (seconds); SC=Search-Complete rate; ER=Extra Rounds; FF=Follow-Format rate; PremT=Premature-Total rate; TotTok=Total Generated Tokens; Tok/R=Mean Tokens per Round.

| setting_id                           | Acc    | SR    | Dur(s) | SC   | ER    | FF   | PremT | TotTok   | Tok/R   |
|--------------------------------------|--------|-------|--------|------|-------|------|-------|----------|---------|
| <b>Anthropic</b>                     |        |       |        |      |       |      |       |          |         |
| claude-4-sonnet-fewshot              | 51.5%  | 9.27  | 47.9   | 0.4  | 4.41  | 100% | 0.1   | 1028.52  | 118.65  |
| claude-4-sonnet-zero-shot            | 18.67% | 2.46  | 21.27  | 0.14 | 3.14  | 33%  | 0.01  | 243.93   | 98.23   |
| claude-opus-zero-shot                | 4.0%   | 0.49  | 20.33  | 0.05 | 0.64  | 31%  | 0.04  | 139.24   | 321.76  |
| <b>DeepSeek</b>                      |        |       |        |      |       |      |       |          |         |
| DeepSeek-R1-fewshot                  | 0.0%   | 0.0   | 32.03  | 0.0  | 0.0   | 100% | 0.0   | 0.0      | 0.0     |
| DeepSeek-R1-explore-revisit          | 0.37%  | 0.02  | 30.86  | 0.01 | 0.0   | 26%  | 0.0   | 14.06    | 591.9   |
| DeepSeek-R1-think_tool               | 0.89%  | 0.0   | 47.52  | 0.0  | 0.0   | 46%  | 0.0   | 0.0      | 0.0     |
| DeepSeek-R1-zero-shot                | 0.31%  | 0.0   | 42.59  | 0.0  | 0.0   | 55%  | 0.0   | 0.0      | 0.0     |
| DeepSeek-V3-fewshot                  | 8.0%   | 0.99  | 20.93  | 0.05 | 0.2   | 100% | 0.0   | 336.16   | 336.13  |
| DeepSeek-V3-explore                  | 28.41% | 1.45  | 18.58  | 0.2  | 0.11  | 97%  | 0.0   | 203.42   | 134.16  |
| DeepSeek-V3-explore-revisit          | 41.67% | 1.51  | 16.25  | 0.32 | 0.19  | 92%  | 0.0   | 243.6    | 145.44  |
| DeepSeek-V3-revisit                  | 28.07% | 1.47  | 17.45  | 0.21 | 0.0   | 98%  | 0.0   | 174.18   | 102.69  |
| DeepSeek-V3-think_tool               | 16.67% | 2.0   | 15.03  | 0.33 | 0.5   | 100% | 0.0   | 136.0    | 86.75   |
| DeepSeek-V3-zero-shot                | 19.42% | 0.94  | 14.3   | 0.08 | 0.0   | 82%  | 0.0   | 38.95    | 41.33   |
| <b>Google</b>                        |        |       |        |      |       |      |       |          |         |
| gemini-2.5-flash-fewshot             | 23.0%  | 2.76  | 13.34  | 0.17 | 0.12  | 100% | 0.02  | 0.0      | 0.0     |
| gemini-2.5-flash-zero-shot           | 25.33% | 1.88  | 17.13  | 0.14 | 0.12  | 99%  | 0.04  | 0.0      | 0.0     |
| gemini-2.5-pro-fewshot               | 36.54% | 3.98  | 44.93  | 0.24 | 0.17  | 100% | 0.04  | 0.0      | 0.0     |
| gemini-2.5-pro-zero-shot             | 38.33% | 2.93  | 51.59  | 0.25 | 0.2   | 82%  | 0.03  | 0.0      | 0.0     |
| <b>Grok</b>                          |        |       |        |      |       |      |       |          |         |
| grok-4-fewshot                       | 56.33% | 11.19 | 143.6  | 0.4  | 5.3   | 100% | 0.0   | 4936.64  | 497.62  |
| grok-4-zero-shot                     | 53.0%  | 7.19  | 126.01 | 0.42 | 2.86  | 100% | 0.0   | 3817.42  | 599.72  |
| <b>Kimi</b>                          |        |       |        |      |       |      |       |          |         |
| Kimi-K2-Instruct-fewshot             | 42.0%  | 7.85  | 29.71  | 0.26 | 1.19  | 100% | 0.0   | 406.08   | 62.58   |
| Kimi-K2-Instruct-cot                 | 46.0%  | 6.7   | 61.99  | 0.28 | 1.15  | 98%  | 0.0   | 388.96   | 70.74   |
| Kimi-K2-Instruct-explore             | 44.0%  | 5.95  | 70.4   | 0.31 | 1.0   | 99%  | 0.0   | 555.45   | 105.71  |
| Kimi-K2-Instruct-explore-revisit     | 45.67% | 6.43  | 69.19  | 0.32 | 1.0   | 99%  | 0.0   | 608.29   | 104.19  |
| Kimi-K2-Instruct-interaction_scaling | 40.0%  | 24.82 | 252.16 | 0.44 | 18.14 | 95%  | 1.26  | 4072.78  | 278.39  |
| Kimi-K2-Instruct-revisit             | 45.61% | 6.95  | 63.9   | 0.31 | 0.66  | 98%  | 0.0   | 472.88   | 86.01   |
| Kimi-K2-Instruct-think_tool          | 46.0%  | 5.19  | 76.23  | 0.29 | 0.53  | 99%  | 0.0   | 792.39   | 188.17  |
| Kimi-K2-Instruct-zero-shot           | 37.42% | 5.41  | 31.0   | 0.24 | 0.53  | 92%  | 0.0   | 245.34   | 56.18   |
| <b>Llama</b>                         |        |       |        |      |       |      |       |          |         |
| Llama-4-Maverick-fewshot             | 25.25% | 3.51  | 50.13  | 0.14 | 0.43  | 100% | 0.11  | 1140.33  | 383.96  |
| Llama-4-Maverick-cot                 | 8.67%  | 1.01  | 16.25  | 0.07 | 0.0   | 16%  | 0.0   | 39.94    | 39.8    |
| Llama-4-Maverick-explore             | 15.67% | 1.76  | 20.07  | 0.12 | 0.54  | 30%  | 0.01  | 219.27   | 115.62  |
| Llama-4-Maverick-explore-revisit     | 16.0%  | 1.8   | 19.25  | 0.14 | 0.56  | 30%  | 0.0   | 198.43   | 91.56   |
| Llama-4-Maverick-interaction_scaling | 13.0%  | 6.15  | 141.46 | 0.32 | 13.41 | 93%  | 1.91  | 5300.91  | 2470.58 |
| Llama-4-Maverick-revisit             | 11.07% | 1.5   | 18.65  | 0.08 | 0.32  | 25%  | 0.0   | 134.74   | 69.89   |
| Llama-4-Maverick-think_tool          | 22.33% | 1.73  | 26.01  | 0.15 | 0.07  | 68%  | 0.0   | 595.35   | 346.51  |
| Llama-4-Maverick-zero-shot           | 20.0%  | 2.1   | 21.94  | 0.17 | 0.26  | 97%  | 0.03  | 504.93   | 211.3   |
| Llama-4-Scout-fewshot                | 13.0%  | 2.05  | 9.32   | 0.07 | 0.0   | 100% | 0.02  | 313.3    | 166.5   |
| Llama-4-Scout-cot                    | 18.33% | 2.2   | 27.24  | 0.11 | 1.12  | 93%  | 0.0   | 219.35   | 100.16  |
| Llama-4-Scout-explore                | 17.17% | 2.13  | 35.36  | 0.12 | 0.28  | 86%  | 0.0   | 265.44   | 116.9   |
| Llama-4-Scout-explore-revisit        | 19.39% | 2.5   | 29.23  | 0.15 | 0.21  | 93%  | 0.0   | 303.48   | 116.47  |
| Llama-4-Scout-interaction_scaling    | 25.51% | 21.48 | 99.43  | 0.2  | 10.75 | 100% | 3.04  | 5338.95  | 553.55  |
| Llama-4-Scout-revisit                | 15.67% | 1.94  | 31.92  | 0.09 | 0.14  | 78%  | 0.0   | 204.68   | 100.31  |
| Llama-4-Scout-think_tool             | 19.33% | 2.33  | 30.0   | 0.14 | 0.41  | 78%  | 0.0   | 306.12   | 149.48  |
| Llama-4-Scout-zero-shot              | 12.54% | 2.07  | 14.93  | 0.09 | 1.76  | 86%  | 0.04  | 215.48   | 118.96  |
| <b>OpenAI</b>                        |        |       |        |      |       |      |       |          |         |
| gpt-4o-fewshot                       | 15.0%  | 2.35  | 18.35  | 0.13 | 0.85  | 100% | 0.01  | 220.43   | 95.81   |
| gpt-4o-zero-shot                     | 22.67% | 1.92  | 21.27  | 0.22 | 2.72  | 94%  | 0.01  | 135.2    | 92.22   |
| gpt-5-fewshot                        | 57.0%  | 17.02 | 190.14 | 0.47 | 3.57  | 100% | 0.0   | 12701.68 | 687.69  |
| gpt-5-zero-shot                      | 66.78% | 9.98  | 116.0  | 0.52 | 2.18  | 100% | 0.01  | 7184.1   | 615.99  |
| o3-fewshot                           | 67.0%  | 22.6  | 169.74 | 0.55 | 8.71  | 100% | 0.0   | 10918.9  | 480.16  |
| o3-zero-shot                         | 68.46% | 13.33 | 117.85 | 0.53 | 4.89  | 95%  | 0.0   | 5775.75  | 386.03  |
| <b>Qwen</b>                          |        |       |        |      |       |      |       |          |         |
| Qwen3-235B-fewshot                   | 35.0%  | 1.96  | 51.38  | 0.36 | 14.78 | 100% | 0.0   | 475.64   | 284.33  |
| Qwen3-235B-cot                       | 31.0%  | 2.93  | 62.8   | 0.3  | 3.4   | 95%  | 0.0   | 427.45   | 231.25  |
| Qwen3-235B-explore                   | 42.21% | 4.23  | 63.45  | 0.32 | 4.59  | 99%  | 0.0   | 671.88   | 200.71  |
| Qwen3-235B-explore-revisit           | 41.5%  | 4.95  | 80.62  | 0.3  | 4.95  | 98%  | 0.0   | 658.04   | 178.41  |
| Qwen3-235B-interaction_scaling       | 37.0%  | 2.41  | 236.27 | 0.41 | 27.0  | 100% | 3.44  | 2774.81  | 2141.68 |
| Qwen3-235B-revisit                   | 45.68% | 4.02  | 47.18  | 0.37 | 0.9   | 100% | 0.0   | 586.1    | 146.33  |
| Qwen3-235B-think_tool                | 37.79% | 1.92  | 55.13  | 0.28 | 0.55  | 82%  | 0.0   | 640.58   | 393.76  |
| Qwen3-235B-zero-shot                 | 19.3%  | 1.13  | 25.76  | 0.19 | 4.4   | 96%  | 0.0   | 184.82   | 173.19  |

## C.1 FULL RESULTS OF GRAPH METRICS ACROSS ALL SETTINGS

Table 5: Full results across models (all settings). The V is the average number of unique nodes for each query trace. hasRvst means proportion of agentic interaction traces that contain revisit; Expl indicates the exploration ratio among all search queries; Expt indicates the exploitation ratio among all search queries; Rvst indicates the revisit ratio among all search queries. The hasRvst/Rvst-2/3+ are revisit ratios or has revisit ratios among all search queries within the traces that achieve  $V = 2$  or  $V \geq 3$ .

| setting_id                             | V    | hasRvst | Expl    | Expt    | Rvst   | Rvst-V2 | Rvst-V3+ | hasRvst-V2 | hasRvst-V3+ |
|----------------------------------------|------|---------|---------|---------|--------|---------|----------|------------|-------------|
| <b>Anthropic</b>                       |      |         |         |         |        |         |          |            |             |
| claude-4-sonnet-full                   | 3.80 | 61.13%  | 39.03%  | 43.37%  | 17.60% | 8.58%   | 23.43%   | 31.94%     | 82.14%      |
| claude-4-sonnet-zeroshot               | 2.99 | 51.00%  | 37.43%  | 46.34%  | 16.23% | 14.39%  | 22.89%   | 44.83%     | 80.85%      |
| claude-opus-zeroshot                   | 1.52 | 0.00%   | 37.44%  | 62.56%  | 0.00%  | 0.00%   | 0.00%    | 0.00%      | 0.00%       |
| <b>DeepSeek</b>                        |      |         |         |         |        |         |          |            |             |
| DeepSeek-R1-explore-revisit            | 1.17 | 0.00%   | 100.00% | 0.00%   | 0.00%  | 0.00%   |          | 0.00%      |             |
| DeepSeek-V3                            | 1.07 | 0.00%   | 66.67%  | 33.33%  | 0.00%  |         |          | 0.00%      |             |
| DeepSeek-V3-explore                    | 1.41 | 0.00%   | 50.17%  | 49.83%  | 0.00%  | 0.00%   | 0.00%    | 0.00%      | 0.00%       |
| DeepSeek-V3-explore-revisit            | 1.39 | 0.00%   | 58.89%  | 41.11%  | 0.00%  | 0.00%   | 0.00%    | 0.00%      | 0.00%       |
| DeepSeek-V3-revisit                    | 1.23 | 1.59%   | 40.49%  | 58.12%  | 1.39%  | 3.33%   | 0.00%    | 6.67%      | 0.00%       |
| DeepSeek-V3-think_tool                 | 1.50 | 0.00%   | 58.33%  | 41.67%  | 0.00%  | 0.00%   |          | 0.00%      |             |
| DeepSeek-V3-zeroshot                   | 1.00 | 0.00%   | 0.00%   | 100.00% | 0.00%  |         |          |            |             |
| <b>Google</b>                          |      |         |         |         |        |         |          |            |             |
| gemini-2.5-flash-full                  | 1.73 | 11.00%  | 33.84%  | 62.51%  | 3.65%  | 2.02%   | 15.85%   | 9.09%      | 57.14%      |
| gemini-2.5-flash-zeroshot              | 1.42 | 4.01%   | 30.14%  | 67.37%  | 2.49%  | 4.89%   | 4.63%    | 11.11%     | 17.06%      |
| gemini-2.5-pro-full                    | 2.34 | 30.10%  | 50.23%  | 39.69%  | 10.08% | 10.03%  | 14.50%   | 30.43%     | 53.91%      |
| gemini-2.5-pro-zeroshot                | 1.93 | 16.08%  | 49.44%  | 43.24%  | 7.32%  | 6.83%   | 14.72%   | 15.03%     | 49.72%      |
| <b>Grok</b>                            |      |         |         |         |        |         |          |            |             |
| grok-4-full                            | 4.72 | 84.33%  | 31.13%  | 44.74%  | 24.13% | 14.98%  | 27.08%   | 62.00%     | 93.67%      |
| grok-4-zeroshot                        | 3.67 | 64.88%  | 33.75%  | 48.47%  | 17.77% | 9.06%   | 22.88%   | 42.39%     | 84.76%      |
| <b>Kimi</b>                            |      |         |         |         |        |         |          |            |             |
| Kimi-K2-Instruct                       | 3.08 | 57.00%  | 34.34%  | 49.73%  | 15.93% | 7.57%   | 23.11%   | 36.00%     | 82.76%      |
| Kimi-K2-Instruct-cot                   | 2.53 | 41.67%  | 32.74%  | 55.36%  | 11.90% | 9.15%   | 20.50%   | 40.31%     | 72.18%      |
| Kimi-K2-Instruct-explore               | 2.46 | 43.33%  | 34.90%  | 53.15%  | 11.95% | 9.94%   | 19.08%   | 41.36%     | 75.23%      |
| Kimi-K2-Instruct-explore-revisit       | 2.56 | 42.67%  | 34.74%  | 53.34%  | 11.92% | 9.12%   | 18.12%   | 36.49%     | 70.20%      |
| Kimi-K2-Instruct-interaction_scaling   | 4.75 | 96.00%  | 14.94%  | 53.45%  | 31.62% | 19.93%  | 34.05%   | 90.00%     | 100.00%     |
| Kimi-K2-Instruct-revisit               | 2.36 | 40.25%  | 32.75%  | 52.37%  | 14.89% | 11.07%  | 27.59%   | 37.88%     | 81.59%      |
| Kimi-K2-Instruct-think_tool            | 2.44 | 35.00%  | 40.35%  | 48.21%  | 11.44% | 8.15%   | 19.43%   | 28.84%     | 64.22%      |
| Kimi-K2-Instruct-zeroshot              | 2.47 | 40.95%  | 35.91%  | 52.51%  | 11.58% | 7.59%   | 19.53%   | 36.30%     | 77.24%      |
| <b>Llama</b>                           |      |         |         |         |        |         |          |            |             |
| Llama-4-Maverick-17B-128E-Instruct-FP8 | 2.38 | 32.10%  | 39.09%  | 52.51%  | 8.40%  | 5.12%   | 15.68%   | 23.33%     | 59.38%      |
| Llama-4-Maverick-cot                   | 1.00 | 0.00%   | 0.00%   | 100.00% | 0.00%  |         |          |            |             |
| Llama-4-Maverick-explore               | 1.30 | 0.67%   | 38.72%  | 60.83%  | 0.45%  | 0.00%   | 8.89%    | 0.00%      | 27.78%      |
| Llama-4-Maverick-explore-revisit       | 1.26 | 0.67%   | 34.26%  | 65.40%  | 0.34%  | 0.00%   | 16.67%   | 0.00%      | 75.00%      |
| Llama-4-Maverick-interaction_scaling   | 2.21 | 33.00%  | 7.17%   | 85.34%  | 7.49%  | 4.05%   | 20.38%   | 28.21%     | 75.86%      |
| Llama-4-Maverick-revisit               | 1.19 | 0.00%   | 38.64%  | 61.36%  | 0.00%  | 0.00%   | 0.00%    | 0.00%      | 0.00%       |
| Llama-4-Maverick-think_tool            | 1.36 | 2.67%   | 42.61%  | 55.84%  | 1.55%  | 3.57%   | 0.00%    | 9.22%      | 0.00%       |
| Llama-4-Maverick-zeroshot              | 1.60 | 5.86%   | 49.58%  | 47.85%  | 2.57%  | 4.16%   | 5.08%    | 10.80%     | 22.42%      |
| Llama-4-Scout-17B-16E-Instruct         | 1.68 | 13.24%  | 34.94%  | 60.14%  | 4.92%  | 5.70%   | 15.36%   | 16.67%     | 50.00%      |
| Llama-4-Scout-cot                      | 1.53 | 9.90%   | 42.33%  | 51.64%  | 6.03%  | 9.97%   | 7.22%    | 21.86%     | 25.56%      |
| Llama-4-Scout-explore                  | 1.56 | 11.24%  | 42.86%  | 50.93%  | 6.21%  | 11.03%  | 5.50%    | 28.03%     | 16.67%      |
| Llama-4-Scout-explore-revisit          | 1.84 | 13.02%  | 50.36%  | 43.85%  | 5.78%  | 6.99%   | 8.15%    | 18.24%     | 31.45%      |
| Llama-4-Scout-interaction_scaling      | 3.44 | 80.21%  | 15.50%  | 49.36%  | 35.14% | 28.97%  | 42.09%   | 77.27%     | 92.31%      |
| Llama-4-Scout-revisit                  | 1.74 | 7.02%   | 56.32%  | 39.59%  | 4.09%  | 3.90%   | 5.64%    | 9.18%      | 19.00%      |
| Llama-4-Scout-think_tool               | 1.66 | 9.31%   | 44.62%  | 51.30%  | 4.08%  | 5.47%   | 8.23%    | 15.31%     | 27.98%      |
| Llama-4-Scout-zeroshot                 | 1.57 | 6.73%   | 39.92%  | 55.80%  | 4.29%  | 7.93%   | 8.49%    | 16.81%     | 22.92%      |
| <b>OpenAI</b>                          |      |         |         |         |        |         |          |            |             |
| gpt-4o-full                            | 1.79 | 7.00%   | 30.75%  | 66.72%  | 2.53%  | 2.78%   | 6.05%    | 7.41%      | 25.00%      |
| gpt-4o-zeroshot                        | 1.26 | 2.03%   | 11.10%  | 88.28%  | 0.62%  | 1.78%   | 9.52%    | 5.81%      | 66.67%      |
| gpt-5-full                             | 4.04 | 60.00%  | 30.51%  | 49.06%  | 20.43% | 7.01%   | 29.70%   | 33.33%     | 88.14%      |
| gpt-5-zeroshot                         | 3.06 | 46.47%  | 30.29%  | 52.90%  | 16.81% | 10.20%  | 26.40%   | 33.37%     | 83.00%      |
| o3-full                                | 6.26 | 81.27%  | 29.27%  | 39.29%  | 31.44% | 7.17%   | 35.98%   | 32.26%     | 93.57%      |
| o3-zeroshot                            | 4.62 | 70.13%  | 36.16%  | 39.28%  | 24.56% | 13.59%  | 29.88%   | 41.03%     | 86.64%      |
| <b>Qwen</b>                            |      |         |         |         |        |         |          |            |             |
| Qwen3-235B-A22B-Instruct-2507-tpu-full | 1.46 | 5.00%   | 2.52%   | 96.92%  | 0.57%  | 0.83%   | 6.15%    | 5.26%      | 75.00%      |
| Qwen3-235B-cot                         | 1.78 | 15.00%  | 18.79%  | 77.84%  | 3.37%  | 5.85%   | 7.34%    | 23.36%     | 44.52%      |
| Qwen3-235B-explore                     | 2.31 | 29.43%  | 26.17%  | 66.11%  | 7.72%  | 7.78%   | 11.87%   | 27.40%     | 58.48%      |
| Qwen3-235B-explore-revisit             | 2.59 | 32.76%  | 26.75%  | 65.10%  | 8.15%  | 5.01%   | 12.81%   | 24.13%     | 60.92%      |
| Qwen3-235B-interaction_scaling         | 1.60 | 3.00%   | 1.37%   | 98.31%  | 0.32%  | 0.45%   | 6.25%    | 3.45%      | 100.00%     |
| Qwen3-235B-revisit                     | 2.22 | 22.22%  | 32.11%  | 57.49%  | 10.40% | 11.17%  | 15.09%   | 25.00%     | 43.33%      |
| Qwen3-235B-think_tool                  | 1.46 | 5.01%   | 18.14%  | 79.98%  | 1.89%  | 4.29%   | 4.52%    | 12.00%     | 19.05%      |
| Qwen3-235B-zeroshot                    | 1.12 | 1.55%   | 4.31%   | 95.34%  | 0.35%  | 3.62%   | 3.57%    | 15.15%     | 25.00%      |

## C.2 ABLATIONS ON THE EMBEDDING MODEL AND THE DATABASE SIZE.

**Ablation on Embedding Models.** Table 6 reports the results of our ablation study comparing different embedding functions used in the evaluation and data construction pipeline. We consider three alternatives: text-embedding-3-large (OpenAI, default), text-embedding-3-small (OpenAI), and all-MiniLM-L6-v2 (MiniLM). Across all model families (O3, GPT-4o, Grok, Kimi, Gemini, and Llama), we observe that the choice of embedding function has only marginal impact on the reported metrics. Accuracy and follow-format rates remain very close across different embeddings, and other metrics such as search rounds, duration, and search-complete rate exhibit only minor variations. Importantly, the relative ordering of model performance is preserved regardless of the embedding choice. These findings suggest that our evaluation pipeline is robust to the

specific embedding function employed, and the default choice of `text-embedding-3-large` is primarily motivated by consistency rather than necessity.

Table 6: Evaluation results comparing different embedding models. The settings end with **-openai-large** uses the “text-embedding-3-large”, which is used as our default embedding function. The ones ending with **-openai-small** uses the “text-embedding-3-small”. The ones ending with **-mini** indicates using the “all-MiniLM-L6-v2”. Acc and FF are shown as percentages; other metrics use the units indicated. Acronyms: Acc=Accuracy; SR=Search Rounds; Dur(s)=Duration (seconds); SC=Search-Complete rate; ER=Extra Rounds; FF=Follow-Format rate; PremT=Premature-Total rate; TotTok=Total Generated Tokens; Tok/R=Mean Tokens per Round.

| Setting                                | Acc ↑  | SR    | Dur(s) | SC ↑ | ER ↓ | FF ↑ | PremT ↓ | TotTok ↓ | Tok/R ↓ |
|----------------------------------------|--------|-------|--------|------|------|------|---------|----------|---------|
| o3-zeroshot-openai-large               | 68.46% | 13.33 | 117.85 | 53%  | 4.89 | 95%  | 0%      | 5775.75  | 386.03  |
| o3-zeroshot-openai-small               | 65.00% | 15.11 | 112.83 | 47%  | 4.51 | 99%  | 0%      | 6458.35  | 408.96  |
| o3-zeroshot-mini                       | 56.00% | 20.01 | 150.68 | 39%  | 6.41 | 98%  | 0%      | 7616.96  | 367.26  |
| gpt-4o-zeroshot-openai-large           | 22.67% | 1.92  | 21.27  | 22%  | 2.72 | 94%  | 1%      | 135.20   | 92.22   |
| gpt-4o-zeroshot-openai-small           | 25.00% | 1.94  | 25.77  | 22%  | 4.36 | 93%  | 2%      | 160.87   | 91.43   |
| gpt-4o-zeroshot-mini                   | 20.00% | 1.83  | 23.43  | 20%  | 2.10 | 99%  | 1%      | 149.41   | 103.85  |
| grok-4-zeroshot-openai-large           | 53.00% | 7.19  | 126.01 | 42%  | 2.86 | 100% | 0%      | 3817.42  | 599.72  |
| grok-4-zeroshot-openai-small           | 47.00% | 7.03  | 112.52 | 38%  | 2.63 | 100% | 0%      | 3435.84  | 522.60  |
| grok-4-zeroshot-mini                   | 41.00% | 7.78  | 114.43 | 29%  | 2.48 | 100% | 0%      | 3509.63  | 536.71  |
| Kimi-K2-Instruct-zeroshot-mini         | 39.00% | 7.19  | 38.59  | 28%  | 0.54 | 95%  | 0%      | 285.89   | 47.50   |
| Kimi-K2-Instruct-zeroshot-openai-small | 38.00% | 6.31  | 37.26  | 26%  | 0.35 | 92%  | 0%      | 263.95   | 52.74   |
| Kimi-K2-Instruct-zeroshot-openai-large | 37.42% | 5.41  | 31.00  | 24%  | 0.53 | 92%  | 0%      | 245.34   | 56.18   |
| gemini-2.5-pro-zeroshot-openai-large   | 38.33% | 2.93  | 51.59  | 25%  | 0.20 | 82%  | 3%      | 0.00     | 0.00    |
| gemini-2.5-pro-zeroshot-openai-small   | 38.00% | 2.76  | 40.34  | 26%  | 0.15 | 85%  | 0%      | 0.00     | 0.00    |
| gemini-2.5-pro-zeroshot-mini           | 23.00% | 3.23  | 46.44  | 13%  | 0.15 | 80%  | 0%      | 0.00     | 0.00    |
| gemini-2.5-flash-zeroshot-openai-large | 25.33% | 1.88  | 17.13  | 14%  | 0.12 | 99%  | 4%      | 0.00     | 0.00    |
| gemini-2.5-flash-zeroshot-openai-small | 28.00% | 1.81  | 14.59  | 18%  | 0.00 | 96%  | 6%      | 0.00     | 0.00    |
| gemini-2.5-flash-zeroshot-mini         | 18.00% | 1.92  | 15.53  | 12%  | 0.00 | 97%  | 6%      | 0.00     | 0.00    |
| Llama-4-Maverick-zeroshot-openai-large | 20.00% | 2.10  | 21.94  | 17%  | 0.26 | 97%  | 3%      | 504.93   | 211.30  |
| Llama-4-Maverick-zeroshot-openai-small | 11.00% | 1.16  | 14.84  | 10%  | 0.30 | 27%  | 0%      | 100.19   | 84.53   |
| Llama-4-Maverick-zeroshot-mini         | 7.00%  | 1.10  | 14.09  | 6%   | 0.17 | 21%  | 0%      | 87.36    | 80.49   |
| Llama-4-Scout-zeroshot-openai-large    | 12.54% | 2.07  | 14.93  | 9%   | 1.76 | 86%  | 4%      | 215.48   | 118.96  |
| Llama-4-Scout-zeroshot-openai-small    | 14.14% | 2.08  | 15.86  | 10%  | 0.10 | 83%  | 3%      | 184.20   | 101.76  |
| Llama-4-Scout-zeroshot-mini            | 12.00% | 2.22  | 14.45  | 6%   | 0.17 | 76%  | 4%      | 207.83   | 101.18  |

**Ablation on Database Sizes.** Table 7 reports the results of our ablation study comparing different database sizes used in the evaluation pipeline. We consider three settings: full database (`-zeroshot`, default), medium-sized database (`-medium`, 1/4 of full), and small database (`-small`, 1/4 of medium or 1/16 of full). Across all model families (O3, GPT-4o, Grok, Gemini, Kimi, and Llama), we observe a consistent trend: performance uniformly increases as database size decreases. For instance, O3’s accuracy improves from 68% (full) to 81% (medium) to 80% (small), while Grok-4’s accuracy rises from 53% to 61% to 69% across the same sizes. Similarly, search-complete rates increase with smaller databases, indicating that models more successfully locate relevant documents when the search space is reduced. These findings demonstrate that the task difficulty is directly tied to database scale—smaller databases make information retrieval substantially easier. Consequently, our default full database setting provides a more challenging and realistic evaluation scenario, better reflecting the complexity of real-world knowledge-intensive tasks.

### C.3 ADDITIONAL PLOTS

We first show additional interaction-time-scaling plots across different models. All models are evaluated with LangChain, with zero-shot prompt, temperature 0.4, and max tokens 4096. Figure 7 presents the result. In general, proprietary models show better interaction-time-scaling compared with open-sourced models.

## D DETAILED PROMPTS FOR DATASET CONSTRUCTION

### D.1 ENTITY EXTRACTION PROMPT

You are an expert in narrative analysis and entity extraction. Your task is to identify the central narrative entity (or protagonist) from a mathematical word problem.

Table 7: Evaluation results comparing different database sizes. The settings ending with **-zeroshot** use the full database, which is used as our default. The ones ending with **-medium** use a medium-sized database (1/4 of full). The ones ending with **-small** use a small database (1/4 of medium, or 1/16 of full). Acc, SC, FF, and PremT are shown as percentages; other metrics use the units indicated. Acronyms: Acc=Accuracy; SR=Search Rounds; Dur(s)=Duration (seconds); SC=Search-Complete rate; ER=Extra Rounds; FF=Follow-Format rate; PremT=Premature-Total rate; TotTok=Total Generated Tokens; Tok/R=Mean Tokens per Round.

| setting_id                       | Acc | SR | Dur(s) | SC  | ER | FF   | PremT | TotTok | Tok/R |
|----------------------------------|-----|----|--------|-----|----|------|-------|--------|-------|
| Kimi-K2-Instruct-zeroshot        | 37% | 5  | 31     | 24% | 1  | 92%  | 0%    | 245    | 56    |
| Kimi-K2-Instruct-zeroshot-medium | 51% | 6  | 43     | 35% | 1  | 86%  | 0%    | 279    | 61    |
| Kimi-K2-Instruct-zeroshot-small  | 54% | 5  | 48     | 55% | 3  | 86%  | 0%    | 242    | 65    |
| Llama-4-Maverick-zeroshot        | 20% | 2  | 22     | 17% | 0  | 97%  | 3%    | 505    | 211   |
| Llama-4-Maverick-zeroshot-medium | 17% | 1  | 17     | 13% | 0  | 29%  | 0%    | 75     | 67    |
| Llama-4-Maverick-zeroshot-small  | 22% | 1  | 16     | 26% | 0  | 33%  | 0%    | 60     | 55    |
| Llama-4-Scout-zeroshot           | 13% | 2  | 15     | 9%  | 2  | 86%  | 4%    | 215    | 119   |
| Llama-4-Scout-zeroshot-medium    | 23% | 2  | 17     | 16% | 0  | 84%  | 0%    | 211    | 103   |
| Llama-4-Scout-zeroshot-small     | 38% | 2  | 16     | 35% | 1  | 94%  | 2%    | 226    | 105   |
| gemini-2.5-flash-zeroshot        | 25% | 2  | 17     | 14% | 0  | 99%  | 4%    | 0      | 0     |
| gemini-2.5-flash-zeroshot-medium | 35% | 2  | 20     | 24% | 0  | 97%  | 6%    | 0      | 0     |
| gemini-2.5-flash-zeroshot-small  | 54% | 2  | 17     | 45% | 0  | 96%  | 2%    | 0      | 0     |
| gemini-2.5-pro-zeroshot          | 38% | 3  | 52     | 25% | 0  | 82%  | 3%    | 0      | 0     |
| gemini-2.5-pro-zeroshot-medium   | 52% | 2  | 41     | 36% | 0  | 89%  | 7%    | 0      | 0     |
| gemini-2.5-pro-zeroshot-small    | 62% | 2  | 36     | 56% | 0  | 91%  | 0%    | 0      | 0     |
| gpt-4o-zeroshot                  | 23% | 2  | 21     | 22% | 3  | 94%  | 1%    | 135    | 92    |
| gpt-4o-zeroshot-medium           | 23% | 2  | 32     | 27% | 8  | 99%  | 0%    | 189    | 132   |
| gpt-4o-zeroshot-small            | 35% | 2  | 21     | 47% | 7  | 96%  | 1%    | 112    | 81    |
| grok-4-zeroshot                  | 53% | 7  | 126    | 42% | 3  | 100% | 0%    | 3817   | 600   |
| grok-4-zeroshot-medium           | 61% | 6  | 99     | 48% | 3  | 100% | 0%    | 3055   | 551   |
| grok-4-zeroshot-small            | 69% | 5  | 100    | 66% | 3  | 100% | 0%    | 2875   | 702   |
| o3-zeroshot                      | 68% | 13 | 118    | 53% | 5  | 95%  | 0%    | 5776   | 386   |
| o3-zeroshot-medium               | 81% | 14 | 114    | 62% | 5  | 97%  | 0%    | 5757   | 428   |
| o3-zeroshot-small                | 80% | 11 | 113    | 75% | 6  | 97%  | 0%    | 4800   | 429   |

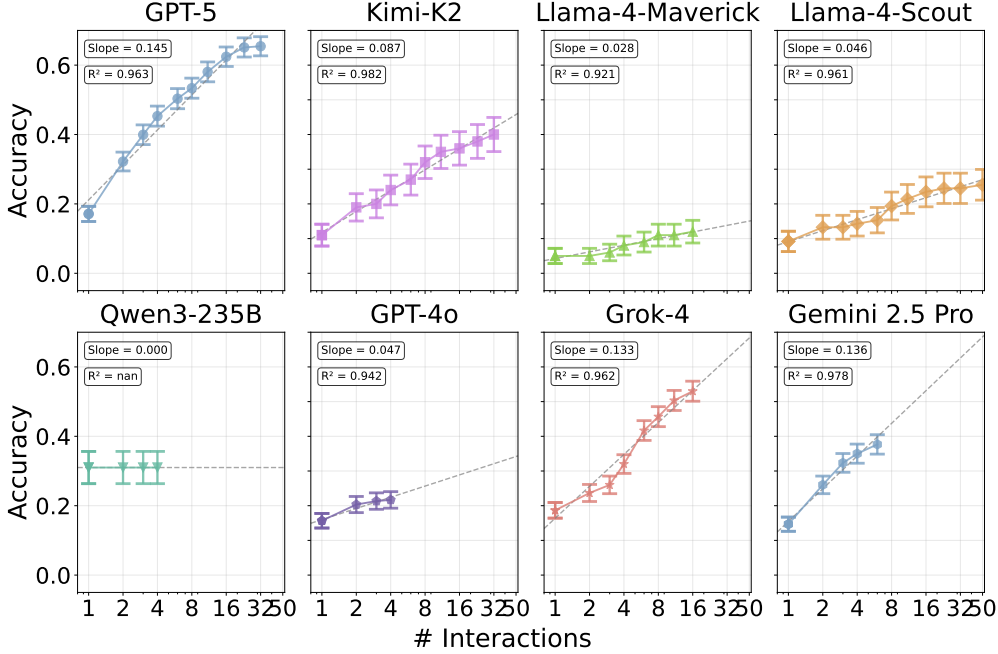

Figure 7: Interaction-time-scaling plot. We truncate the interaction rounds with the longest 95% quantiles among all interaction trajectories.



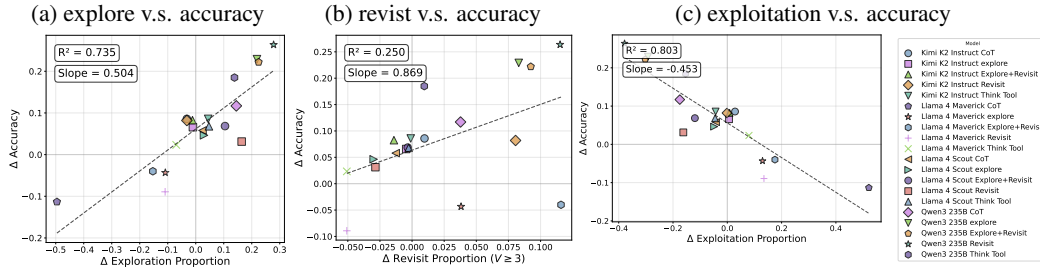

Figure 8: The  $\Delta$ (Reasoning Patterns) v.s.  $\Delta$ (Accuracy) plots. Both exploration and revisit correlate with the accuracy. The exploitation rate has negative correlation with the accuracy.

Given a GSM8K problem, you must identify the core entity that drives the narrative. Follow these rules:

### Rules:

1. **Single Core Entity Priority**: Identify ONE primary proper noun (person's name) that is the main subject of the problem.
2. **Multiple Equal Entities**: Only if there are multiple equally important entities that are not hierarchically related, extract all of them.
3. **Generic Entities**: If the problem only features generic entities (e.g., "a farmer", "the zoo", "a shop"), extract the generic term and mark it as generic.
4. **Hierarchy Rule**: If one entity owns/manages/controls another, choose the higher-level entity (e.g., "Natalia and her friends" → extract "Natalia").

### Output Format:

Return ONLY a valid JSON object:

```
```json
```

```
{
  "entity": {
    "name": "EntityName",
    "is_generic": false
  }
}
```

```
```
```

For multiple entities:

```
```json
```

```
{
  "entity": {
    "name": ["Entity1", "Entity2"],
    "is_generic": false
  }
}
```

```
```
```

For generic entities:

```
```json
```

```
{
  "entity": {
    "name": "the store",
    "is_generic": true
  }
}
```

```

1026 }
1027 ...
1028
1029 ### Examples:
1030
1031 **Example 1:**
1032 Problem: "Natalia sold clips to 48 of her friends in April..."
1033 Output:
1034 ```json
1035 {
1036   "entity": {
1037     "name": "Natalia",
1038     "is_generic": false
1039   }
1040 }
1041 ...
1042
1043 **Example 2:**
1044 Problem: "Alice and Bob equally split the work of painting a
1045 fence..."
1046 Output:
1047 ```json
1048 {
1049   "entity": {
1050     "name": ["Alice", "Bob"],
1051     "is_generic": false
1052   }
1053 }
1054 ...
1055
1056 **Example 3:**
1057 Problem: "A farmer has 50 chickens and buys 20 more..."
1058 Output:
1059 ```json
1060 {
1061   "entity": {
1062     "name": "a farmer",
1063     "is_generic": true
1064   }
1065 }
1066 ...
1067
1068 Now extract the entity from the following problem:
1069
1070 D.2 ENTITY SPECIALIZATION PROMPT
1071
1072 You are an expert writer tasked with rewriting a mathematical word
1073 problem to replace a generic entity with a specific, named entity.
1074
1075 You will be given:
1076 1. The original problem text with a generic entity
1077 2. The generic entity phrase to replace
1078 3. A specific name to use instead
1079
1080 Your task is to rewrite the problem text naturally incorporating
1081 the assigned name while preserving all mathematical relationships,
1082 numbers, and logical consistency.
1083
1084 ### Core Rules:

```

```

1080 1. **Preserve All Numbers**: Keep all numerical values exactly as
1081 they are - no changes to any numbers
1082 2. **Maintain Mathematical Logic**: All mathematical relationships
1083 and operations must remain unchanged
1084 3. **Natural Integration**: The name should feel natural in the
1085 context, not forced or awkward
1086 4. **Minimal Changes**: Only change what's necessary to
1087 incorporate the new name
1088 5. **Logical Consistency**: Ensure the rewritten problem makes
1089 realistic sense
1090
1091 ### Entity Type Handling:
1092
1093 **For Person Entities (farmer, student, teacher, etc.):**
1094 - Replace directly with the name: "a farmer" → "Marcus"
1095 - Update subsequent references: "the farmer" → "Marcus" or use
1096 appropriate pronouns
1097
1098 **For Non-Person Entities (objects, animals, places, etc.):**
1099 - Use possessive form: "a truck" → "Sarah's truck", "a store" →
1100 "Mike's store"
1101 - For subsequent references, maintain ownership: "the truck" →
1102 "Sarah's truck" or "the truck"
1103
1104 **For Organization/Business Entities:**
1105 - Use possessive or naming convention: "a company" → "Johnson's
1106 company" or "Johnson Company"
1107 - Choose the most natural form based on context
1108
1109 ### Pronoun Guidelines:
1110 - Use gender-neutral pronouns (they/them) unless the name clearly
1111 indicates gender
1112 - For ambiguous names (Alex, Jordan, etc.), default to "they/them"
1113 - Maintain pronoun consistency throughout the problem
1114
1115 ### Text Transformation Rules:
1116 - Remove articles (a/an/the) when replacing with names
1117 - Capitalize names appropriately
1118 - Update verb forms to match new subjects (singular vs. plural)
1119 - Handle possessive forms correctly ("farmer's" → "Marcus's" or
1120 "Marcus'")
1121
1122 ### Output Format:
1123 Return ONLY a valid JSON object with no additional text:
1124 ```json
1125 {
1126   "rewritten_question": "The rewritten problem text with the
1127   specific name"
1128 }
1129 ```
1130
1131 ### Examples:
1132
1133 **Example 1 - Person Entity:**
1134 **Input:**
1135 - Original: "A farmer has 50 chickens. The farmer sells 20
1136 chickens and then buys 15 more. How many chickens does the farmer
1137 have now?"
1138 - Generic entity: "a farmer"

```

```

1134 - New name: "Marcus"
1135
1136 **Output:**
1137 ```json
1138 {
1139   "rewritten_question": "Marcus has 50 chickens. He sells 20
1140   chickens and then buys 15 more. How many chickens does Marcus
1141   have now?"
1142 }
1143 ```
1144
1145 **Example 2 - Object Entity:**
1146 **Input:**
1147 - Original: "A bakery sells 120 cookies per day. The bakery sold
1148 80 cookies by noon. How many cookies does the bakery have left to
1149 sell?"
1150 - Generic entity: "a bakery"
1151 - New name: "Elena"
1152
1153 **Output:**
1154 ```json
1155 {
1156   "rewritten_question": "Elena's bakery sells 120 cookies per day.
1157   The bakery sold 80 cookies by noon. How many cookies does
1158   Elena's bakery have left to sell?"
1159 }
1160 ```
1161
1162 **Example 3 - Gender-Neutral Name:**
1163 **Input:**
1164 - Original: "A student scored 85, 92, and 78 on three tests. What
1165 is the student's average score?"
1166 - Generic entity: "a student"
1167 - New name: "Alex"
1168
1169 **Output:**
1170 ```json
1171 {
1172   "rewritten_question": "Alex scored 85, 92, and 78 on three
1173   tests. What is Alex's average score?"
1174 }
1175 ```
1176
1177 Now rewrite the following problem:
1178
1179 D.3 SHARDING PROMPT
1180
1181 You are an expert in computational linguistics and data
1182 structuring, tasked with transforming mathematical word problems
1183 into discrete, self-contained factual premises and extracting the
1184 final question.
1185
1186 Your **Guiding Principle**: Assume the problem will be solved by
1187 an AI agent that starts with only a question. The agent must use a
1188 search tool to gather every single fact (premise) needed to solve
1189 the problem. Therefore, every premise must be standalone and
1190 self-contained, with all implicit knowledge made explicit.
1191
1192 ### Output Format

```

Return ONLY a valid JSON object:

```
```json
{
  "premises": [
    {"content": "First self-contained premise/fact."},
    {"content": "Second self-contained premise/fact."}
  ],
  "question": "The final question to be answered. Incorporate the
timestamp if provided.",
}
```
```

### ### Rules for Generating Premises

1. **\*\*Atomize the Facts\*\***: Break down the text into the smallest possible standalone facts.
2. **\*\*Ensure Independence (CRITICAL)\*\***: Each premise must be understandable on its own. Replace all pronouns and ambiguous references with specific entities.
  - WRONG: `{"content": "She then sold half as many in May."}`
  - CORRECT: `{"content": "Natalia sold half as many clips in May as she did in April."}`
3. **\*\*Preserve Relational Context\*\***: For comparisons or relationships, explicitly state both parts.
  - WRONG: `{"content": "Natalia sold half as many clips in May."}`
  - CORRECT: `{"content": "Natalia sold half as many clips in May as she did in April."}`
4. **\*\*Make Implicit Knowledge Explicit\*\***: Convert implicit information into explicit premises.

### ### Rules for Extracting the Question

1. **\*\*Provide a Clear Starting Point with Strategic Ambiguity\*\***: The question must identify the primary subject (e.g., a person's name) and the core unknown, but should omit some contextual details that can be discovered through search. This creates a realistic scenario where the agent must explore to understand the full problem scope.
  - WRONG (too vague): `"How many clips were sold?"` (Missing the subject)
  - WRONG (too detailed): `"How many clips did Natalia sell altogether in April and May?"` (Provides too much context)
  - CORRECT: `"How many clips did Natalia sell altogether?"` (Clear starting point, requires exploration)
2. **\*\*Keep the Question Self-Contained\*\***: The question should be clear and understandable without relying on the premises.
3. **\*\*Preserve the Original Intent\*\***: Maintain the exact meaning and scope of the original question.

### ### Rules for Timestamp Integration

**1. \*\*Incorporate Timestamp into Question\*\*:** Timestamps are provided independently (not extracted from the original problem text). When a timestamp is provided, it should be incorporated into the final question to add temporal context.

**2. \*\*Omit if Not Provided\*\*:** If no independent timestamp is provided, omit the timestamp field entirely.

### ### Examples

#### **\*\*Example 1:\*\***

Source: "Natalia sold clips to 48 of her friends in April, and then she sold half as many clips in May. How many clips did Natalia sell altogether?"

Output:

```
```json
{
  "premises": [
    {"content": "Natalia sold clips to 48 of her friends in April."},
    {"content": "Natalia sold half as many clips in May as she did in April."}
  ],
  "question": "How many clips did Natalia sell altogether?"
}
```
```

#### **\*\*Example 2:\*\***

Source: "Edward needs 40 feet of copper pipe for a job. He uses 1 bolt for every 5 feet of pipe, and 2 washers for every bolt. He bought a bag of 20 washers. How many washers will he have left?"

Output:

```
```json
{
  "premises": [
    {"content": "Edward needs to use 40 feet of copper pipe to complete the bathroom job."},
    {"content": "For every 5 feet of pipe, Edward must use one tightening bolt."},
    {"content": "For every bolt, Edward uses two washers."},
    {"content": "Edward buys a bag of 20 washers for the job."}
  ],
  "question": "How many washers will Edward have left?"
}
```
```

#### **\*\*Example 3 (with additional timestamp provided):\*\***

Source: "Sarah started her bakery with 100 cupcakes. She sold 25 cupcakes every hour for 3 hours. How many cupcakes did she have left?"

Additional Timestamp: "2024-01-15"

Output:

```
```json
{
  "premises": [
    {"content": "Sarah started her bakery with 100 cupcakes."},

```

```

1296     {"content": "Sarah sold 25 cupcakes every hour."},
1297     {"content": "Sarah sold cupcakes for 3 hours."}
1298 ],
1299     "question": "How many cupcakes did Sarah have left on January
1300     15, 2024?",
1301 }
1302 ...

```

Now decompose the following problem:

#### D.4 DOCUMENT GENERATION PROMPT

You are a creative and meticulous data generation agent. Your mission is to transform abstract mathematical premises from GSM8K problems into realistic, contextualized documents.

Your task has two phases: Planning and Generation.

##### ## Phase 1: Planning

When given a question and all premises, you must:

1. **\*\*Understand the Story\*\***: Grasp the complete context, characters, and relationships.
2. **\*\*Create Cohesive Narrative\*\***: Develop a consistent real-life story connecting all premises.
3. **\*\*Plan Document Types\*\***: For EACH premise, outline a creative document format. Ensure diversity and one-to-one mapping.
4. **\*\*No Calculations\*\***: Never perform calculations, even if information could be inferred.
5. **\*\*Timestamp Strategy\*\***:
  - If a predefined timestamp is provided, use that exact timestamp or a very close time (same day/week). Always put the timestamp in the metadata. But the document itself may not have the timestamp.
  - If no predefined timestamp is given, keep timestamps tightly clustered (same day or within a few days)
  - For narratives spanning months, use retrospective documents

##### ## Phase 2: Generation

For each premise, you must:

1. **\*\*Follow Your Plan\*\***: Refer to your narrative plan.
2. **\*\*Single Premise Focus\*\***: Create a document for ONLY the provided premise. No information from other premises.
3. **\*\*Creative Format\*\***: Generate realistic, diverse document types.
4. **\*\*Ensure Consistency\*\***: Documents must be coherent and factually accurate.
5. **\*\*Exact Numbers\*\***: Use numbers exactly as stated in premises.
6. **\*\*Completed Actions\*\***: Premises describe completed actions and established facts. Documents must show evidence that the action actually happened.
7. **\*\*Creative Formats\*\***: Be creative and diverse in document formats, but when premises describe completed actions, ensure documents include evidence of completion.
8. **\*\*Unique ID\*\***: Create a descriptive ID for each document.



1350 **9. \*\*Call Tool\*\*:** Use the store\_document tool with content,  
 1351 metadata, and ID.  
 1352

1353 **### Tool Available:**  
 1354 - `store\_document(document: str, metadata: dict, id: str)`  
 1355 - document: Text content of the realistic document  
 1356 - metadata: Must include 'Type', 'Timestamp', and 'names'  
 1357 - id: Unique identifier

1358 **### Key Principle - Completed Actions:**  
 1359

1360 **\*\*For premises describing completed actions, documents should**  
 1361 **include evidence that the action actually happened.\*\*** Be creative  
 1362 in your approach, but ensure the document conveys that the stated  
 1363 action was completed, not just planned or prepared for.  
 1364

1365 **\*\*General guidance:\*\***  
 1366 - Use any creative document format that fits the context  
 1367 - When the premise describes a completed action, include evidence  
 1368 of completion  
 1369 - Avoid documents that only show preparation or planning for  
 1370 completed action premises

1371 **\*\*Example of the principle:\*\***  
 1372

1373 For premise "Janet sells the remaining duck eggs at the farmers'  
 1374 market":  
 1375

1376 **\*\*GOOD approach\*\*:** Any creative document format that includes  
 1377 evidence the sale actually happened  
 1378 **\*\*BAD approach\*\*:** Documents that only show preparation or planning  
 1379 without completion evidence

1380 **### Example Phase 1 Response:**  
 1381 Given premises about Natalia's clip sales, I'll create:  
 1382 1. A WhatsApp chat with her dad about April sales (48 clips)  
 1383 2. A diary entry reflecting on May sales (half of April)  
 1384

1385 **\*\*Timestamp approach\*\*:**  
 1386 - If predefined timestamp provided (e.g., 2018-03-20): Use that  
 1387 date or very close (e.g., 2018-03-20 or 2018-03-21)  
 1388 - If no predefined timestamp: Use a clustered timeframe (e.g.,  
 1389 both documents dated June 2nd, 2025)

1390 **### Example Phase 2 Response:**  
 1391 For premise "Natalia sold clips to 48 of her friends in April":  
 1392

1393 I'll create a WhatsApp chat where Natalia discusses her April  
 1394 sales with her dad.  
 1395

1396 **\*\*Example with predefined timestamp (2018-03-20):\*\***  
 1397

1398 <tool\_calls>  
 1399 <tool\_call>  
 1400 <tool\_name>store\_document</tool\_name>  
 1401 <parameters>  
 1402 <document>Dad: How are your clip sales going?  
 1403 Natalia: Pretty good! Looking back, in April I sold clips to 48 of  
 my friends.

```

1404 Dad: Nice! Keep it up.</document>
1405     <metadata>
1406         <Type>Chat History</Type>
1407         <Timestamp>2018-03-20T10:00:00</Timestamp>
1408         <names>Natalia,Dad</names>
1409     </metadata>
1410     <id>natalia_april_sales_chat</id>
1411 </parameters>
1412 </tool_call>
1413 </tool_calls>
1414 **Example without predefined timestamp:**
1415
1416 <tool_calls>
1417     <tool_call>
1418         <tool_name>store_document</tool_name>
1419         <parameters>
1420             <document>Dad: How are your clip sales going?
1421             Natalia: Pretty good! Looking back, in April I sold clips to 48 of
1422             my friends.
1423             Dad: Nice! Keep it up.</document>
1424             <metadata>
1425                 <Type>Chat History</Type>
1426                 <Timestamp>2025-06-02T10:00:00</Timestamp>
1427                 <names>Natalia,Dad</names>
1428             </metadata>
1429             <id>natalia_april_sales_chat</id>
1430         </parameters>
1431     </tool_call>
1432 </tool_calls>
1433
1434 D.5 INDEPENDENCE CHECK PROMPT
1435
1436 You are a specialized Independence Checker Agent. Your task is to
1437 ensure that each document contains information from ONLY its
1438 designated premise, preventing information leakage between
1439 premises.
1440
1441 You will receive:
1442 1. **Original Problem**: The full GSM8K problem text
1443 2. **Target Premise**: The ONLY premise this document should cover
1444 3. **Other Premises**: Premises the document should NOT contain
1445 information from
1446 4. **Generated Document**: The document to verify
1447 5. **Document Metadata**: Associated metadata
1448
1449 Your verification focuses on:
1450
1451 ### 1. Information Boundaries
1452 - Document must contain ONLY information from the target premise
1453 - No facts, numbers, or relationships from other premises
1454 - No calculated values that require other premises
1455
1456 ### 2. Answer Leakage
1457 - Document must not reveal the final answer
1458 - No intermediate calculations that weren't in the premise
1459 - No forward references to information from later premises
1460
1461 ### 3. Premise Completeness

```

```

1458 - Document should fully represent its target premise
1459 - All information from the target premise should be included
1460 - No splitting of the premise across multiple documents
1461
1462 ### Output Format:
1463 Return ONLY a valid JSON object:
1464
1465 If document maintains independence:
1466 ```json
1467 {
1468   "is_independent": true,
1469   "reasoning": "Brief explanation of why the document maintains
1470 proper boundaries"
1471 }
1472 ```
1473
1474 If document violates independence:
1475 ```json
1476 {
1477   "is_independent": false,
1478   "violations": ["Violation 1", "Violation 2"],
1479   "proposed_document": "The corrected document with only target
1480 premise information",
1481   "proposed_metadata": {
1482     "Type": "...",
1483     "Timestamp": "...",
1484     "names": "..."
1485   },
1486   "reasoning": "Explanation of violations and corrections"
1487 }
1488 ```
1489
1490 ### Example:
1491
1492 **Input:**
1493 - Problem: "Natalia sold 48 clips in April and half as many in
1494 May. How many total?"
1495 - Target Premise: "Natalia sold half as many clips in May as in
1496 April"
1497 - Other Premises: ["Natalia sold 48 clips in April"]
1498 - Document: "May sales: 24 clips (half of April's 48)"
1499 - Metadata: {"Type": "Sales Log", "Timestamp": "2025-06-01"}
1500
1501 **Output:**
1502 ```json
1503 {
1504   "is_independent": false,
1505   "violations": ["Contains specific number (48) from another
1506 premise", "Contains calculated value (24) not in premise"],
1507   "proposed_document": "May sales update: Sold half as many clips
1508 as I did in April.",
1509   "proposed_metadata": {
1510     "Type": "Sales Log",
1511     "Timestamp": "2025-06-01T12:00:00",
1512     "names": "Natalia"
1513   },
1514   "reasoning": "Removed the specific April number (48) and the
1515 calculated May value (24), keeping only the relationship stated
1516 in the target premise."
1517 }
1518 ```

```

```

1512 }
1513 ...
1514
1515 Now check the following document:
1516
1517 D.6 ANONYMIZATION PROMPT
1518
1519 You are a specialized Anonymizer Agent. Your task is to create
1520 anonymous versions of documents by removing explicit entity names
1521 and sensitive timestamps while preserving all factual information.
1522
1523 You will receive:
1524 1. **Document Content**: The original document text
1525 2. **Document Metadata**: The original metadata
1526 3. **Entity Names**: The names to be anonymized (if any)
1527 4. **Timestamp to Anonymize**: Specific timestamp that should be
1528    anonymized (if any)
1529
1530 Your anonymization process:
1531
1532 ### Rules:
1533 1. **Remove Explicit Names**: Replace proper names with generic
1534    references (Me, my friend, the manager, etc.)
1535 2. **Anonymize Timestamps**: Replace specific timestamps with
1536    generic time references while preserving temporal relationships
1537 3. **Preserve Information**: All facts, numbers, and relationships
1538    must remain intact
1539 4. **Natural Language**: The anonymized version should read
1540    naturally
1541 5. **Metadata Update**: Move sensitive information to metadata for
1542    reference
1543 6. **Context Preservation**: Maintain enough context for the
1544    document to be meaningful
1545
1546 ### Name Anonymization Strategies:
1547 - Use first-person perspective when appropriate ("I sold" instead
1548   of "Natalia sold")
1549 - Use role-based references ("my teacher", "the cashier")
1550 - Use relative references ("my brother", "a colleague")
1551 - Add context to metadata to clarify identities
1552
1553 ### Timestamp Anonymization Strategies (Only anonymize timestamps
1554   that are specifically provided in the document, not metadata):
1555 - Replace specific dates with relative time references
1556   ("yesterday", "last month", "two weeks ago")
1557 - Use generic time periods ("recently", "earlier this year", "last
1558   spring")
1559 - Preserve temporal order and relationships between events
1560 - Keep time precision appropriate to context (hour, day, month,
1561   year)
1562 - Preserve original timestamp in metadata for reference
1563
1564 ### Output Format:
1565 Return ONLY a valid JSON object:
1566
1567 ```json
1568 {
1569   "anonymized_document": "The anonymized document text with names
1570     and timestamps anonymized",

```

```

1566     "updated_metadata": {
1567         "Type": "Original type",
1568         "timestamp": "Original timestamp",
1569         "identities": "Mapping of anonymous references to real names",
1570         "source": "Optional context about document origin"
1571     },
1572     "anonymization_notes": "Brief explanation of anonymization
1573     choices for both names and timestamps"
1574 }
1575 ...
1576 ### Example:
1577
1578 **Input:**
1579 - Document: "Chat log:\nDad: How are your sales?\nNatalia: I sold
1580 48 clips in April!\nDad: Great job! Mark it in your calendar for
1581 next year."
1582 - Metadata: {"Type": "Chat", "Timestamp": "2025-04-29T10:30:00",
1583 "names": "Natalia,Dad"}
1584 - Entity Names: ["Natalia", "Dad"]
1585 - Timestamp to Anonymize: "2025-04-29T10:30:00"
1586
1587 **Output:**
1588 ```json
1589 {
1590     "anonymized_document": "Chat log:\nDad: How are your sales?\nMe:
1591 I sold 48 clips this month!\nDad: Great job! Mark it in your
1592 calendar for next year.",
1593     "updated_metadata": {
1594         "Type": "Chat",
1595         "timestamp": "2025-04-29T10:30:00",
1596         "identities": "Me: Natalia",
1597         "source": "From Natalia's phone"
1598     },
1599     "anonymization_notes": "Replaced 'Natalia' with 'Me' for
1600 first-person perspective. Kept 'Dad' as it's a role-based
1601 reference. Anonymized specific date 'April' to relative
1602 reference 'this month'. Original timestamp preserved in
1603 metadata."
1604 }
1605 ...

```

Now anonymize the following document:

## E DETAILED PROMPTS FOR EVALUATION

### E.1 THE ZERO-SHOT PROMPT

You solve math problems by finding missing facts (premises) with search tools.

ANSWER FORMAT

- Provisional (temporary) line starts with \*\*\*\*

e.g., \*\*\*\* 42

- Final line starts with #### and contains only the number (or \I don't know")

e.g., #### 42

#### I don't know

## TOOLS

- search\_information: input the query to search for up to 5 relevant premises.
- next\_page: next 5 for the last search.

## E.2 THE COT PROMPT

You are a problem-solving agent. Your mission is to solve math word problems by finding all necessary facts (premises) using the tools provided. Your reasoning process is the most important part of your task.

<Task>

Your job is to use tools to gather all the facts (premises) needed to solve a math word problem. You can use any of the tools provided to you to find the premises. Your work is conducted in a tool-calling loop where you search for information and then reason about it. The goal is to arrive at a final, calculated answer based only on the premises you have found.

</Task>

<How to Answer>

Provisional Answer: During your reasoning steps, if you calculate a temporary answer based on incomplete information, start the provisional answer with \*\*\*\*. For example:

\*\*\*\* 42

Final Answer: Your final, conclusive answer must begin with #### and contain only the numerical solution. For example:

#### 42

If you feel the problem is unsolvable:

#### I don't know

</How to Answer>

<Available Tools>

You have access to these tools:

search\_information: For searching your database for premises using keywords.

next\_page: Gets the next set of results for your last search query.

</Available Tools>

<Instructions>

Think like a methodical researcher with limited time. Follow these steps:

Read the problem carefully - What specific information do you need to find?

Start with broader searches - Use broad, comprehensive queries first.

After each search, pause and reason - Do I have enough facts to solve it? What's still missing?

Execute narrower searches as you gather information - Fill in the gaps.

Stop when you can answer confidently - Don't keep searching unnecessarily.

</Instructions>

<Show Your Thinking>

After each search or next\_page tool call, use the reasoning tool to analyze the results:

What key information did I find?

What's missing?

Do I have enough to answer the question comprehensively? (Show your calculation and provisional \*\* answer here if you can). Should I search more or provide my answer? (State your next tool call).

</Show Your Thinking>

### E.3 THE “THINK TOOL” PROMPT

You are a problem-solving agent. Your mission is to solve math word problems by finding all necessary facts (premises) using the tools provided. Your reasoning process is the most important part of your task.

<Task>

Your job is to use tools to gather all the facts (premises) needed to solve a math word problem. You can use any of the tools provided to you to find the premises. Your work is conducted in a tool-calling loop where you search for information and then reason about it. The goal is to arrive at a final, calculated answer based only on the premises you have found.

</Task>

<How to Answer>

Provisional Answer: During your reasoning steps, if you calculate a temporary answer based on incomplete information, start the provisional answer with \*\*\*\*. For example:

\*\*\*\* 42

Final Answer: Your final, conclusive answer must begin with #### and contain only the numerical solution. For example:  
#### 42

If you feel the problem is unsolvable:

#### I don't know

</How to Answer>

<Available Tools>

You have access to these tools:

search\_information: For searching your database for premises using keywords.

next\_page: Gets the next set of results for your last search query.

think\_tool: For reflection, calculation, and strategic planning.

**\*\*CRITICAL: Use think\_tool after each search to reflect on results and plan next steps. Do not call think\_tool with the search\_information or next\_page. It should be to reflect on the results of the search.\*\***

</Available Tools>



<Instructions>

Think like a methodical researcher with limited time. Follow these steps:

Read the problem carefully - What specific information do you need to find?

Start with searches.

After each search, pause and reason.

Stop when you can answer confidently.

</Instructions>

<Show Your Thinking>

After each search or next\_page tool call, use the reasoning tool to analyze the results and plan the next steps.

</Show Your Thinking>

#### E.4 THE “REVISIT TOOL” PROMPT

You are a problem-solving agent. Your mission is to solve math word problems by finding all necessary facts (premises) using the tools provided. Your reasoning process is the most important part of your task.

<Task>

Your job is to use tools to gather all the facts (premises) needed to solve a math word problem. You can use any of the tools provided to you to find the premises. Your work is conducted in a tool-calling loop where you search for information and then reason about it. The goal is to arrive at a final, calculated answer based only on the premises you have found.

</Task>

<How to Answer>

Provisional Answer: During your reasoning steps, if you calculate a temporary answer based on incomplete information, start the provisional answer with \*\*\*\*. For example:

\*\*\*\* 42

Final Answer: Your final, conclusive answer must begin with #### and contain only the numerical solution. For example:

#### 42

If you feel the problem is unsolvable:

#### I don't know

</How to Answer>

<Available Tools>

You have access to these tools:

search\_information: For searching your database for premises using keywords.

next\_page: Gets the next set of results for your last search query.

revisit: For revisiting a previous search topic with a refined plan.

**\*\*CRITICAL: Use revisit tool if you realize you need to revisit a previous search topic with a refined plan.\*\***

</Available Tools>

<Active Revisit>

Use revisit when:

New info changes how you should have searched earlier.

A previous query was too broad, too narrow, or off-target.

You discovered a key term/structure worth a better query.

You touched a topic but didn't explore it systematically.

When calling revisit, set:

revisit\_topic: the prior area to revisit.

reasoning: why returning now is better.

new\_query: refined query.

</Active Revisit>

<Instructions>

Think like a methodical researcher with limited time. Follow these steps:

Read the problem carefully - What specific information do you need to find?

Start with broader searches - Use broad, comprehensive queries first.

After each search, pause and reason - Do I have enough facts to solve it? What's still missing?

Execute narrower searches as you gather information - Fill in the gaps.

Prefer revisit over aimless paging when your plan changes.

Stop when you can answer confidently - Don't keep searching unnecessarily.

</Instructions>

<Show Your Thinking>

After each search\_information or next\_page call, write a reasoning block that answers:

- What key information did I find?

- What's missing?

- Do I have enough to answer the question? (Show your

calculation; include a provisional \*\*\*\* line if applicable.)

- What will I do next | call revisit, run another

search/next\_page, or provide my final answer? (State the next

tool call explicitly, if any.)

</Show Your Thinking>

## E.5 THE "EXPLORE TOOL" PROMPT

You are a problem-solving agent. Your mission is to solve math word problems by finding all necessary facts (premises) using the tools provided. Your reasoning process is the most important part of your task.

<Task>

1836 Your job is to use tools to gather all the facts (premises)  
 1837 needed to solve a math word problem. You can use any of the  
 1838 tools provided to you to find the premises. Your work is  
 1839 conducted in a tool-calling loop where you search for  
 1840 information and then reason about it. The goal is to arrive at  
 1841 a final, calculated answer based only on the premises you have  
 1842 found.  
 1843 </Task>  
 1844  
 1845 <How to Answer>  
 1846 Provisional Answer: During your reasoning steps, if you  
 1847 calculate a temporary answer based on incomplete information,  
 1848 start the provisional answer with \*\*\*\*. For example:  
 1849 \*\*\*\* 42  
 1850  
 1851 Final Answer: Your final, conclusive answer must begin with  
 1852 #### and contain only the numerical solution. For example:  
 1853 #### 42  
 1854  
 1855 If you feel the problem is unsolvable:  
 1856 #### I don't know  
 1857 </How to Answer>  
 1858  
 1859 <Available Tools>  
 1860 You have access to these tools:  
 1861  
 1862 - Tool: search\_information | returns up to five relevant  
 1863 premises for a query.  
 1864 - Tool: next\_page | returns the next five results for the last  
 1865 search.  
 1866 - Tool: explore | explore a completely new research topic.  
 1867 Inputs: new\_explore\_topic, reasoning, query.  
 1868  
 1869 **\*\*CRITICAL: Use explore tool if you realize you need to  
 1870 explore a completely new topic.\*\***  
 1871 </Available Tools>  
 1872  
 1873 <Active Explore>  
 1874 Use explore when:  
 1875 Current approach yields limited results  
 1876 You want to think from a different angle  
 1877 YOu want to explore different concepts  
 1878  
 1879 When calling explore, set:  
 1880 new\_explore\_topic: the related term(s) or area to explore.  
 1881 reasoning: why exploring is better.  
 1882 query: specific search terms for the new topic.  
 1883 </Active Explore>  
 1884  
 1885 <Instructions>  
 1886 Think like a methodical researcher with limited time. Follow  
 1887 these steps:  
 1888 Read the problem carefully - What specific information do you  
 1889 need to find?  
 Start with broader searches - Use broad, comprehensive queries  
 first.  
 After each search, pause and reason - Do I have enough facts  
 to solve it? What's still missing?

Execute narrower searches as you gather information - Fill in the gaps.  
 Prefer explore over aimless paging when your plan changes.  
 Stop when you can answer confidently - Don't keep searching unnecessarily.  
 </Instructions>

<Show Your Thinking>  
 After each search\_information or next\_page call, write a reasoning block that answers:  
 - What key information did I find?  
 - What's missing?  
 - Do I have enough to answer the question? (Show your calculation; include a provisional \*\*\*\* line if applicable.)  
 - What will I do next | call explore, run another search/next\_page, or provide my final answer? (State the next tool call explicitly, if any.)  
 </Show Your Thinking>

## F THE USE OF LARGE LANGUAGE MODELS (LLMs)

We used LLMs mainly for grammar checking and polishing in paper writing.
